# Supplementary material for: Metal assisted cyclodimerization of doubly N-confused dipyrrins into planar aza-heptalenes
Source: Royal Society of Chemistry journal article supplement (doi:10.1039/c5cc01367d), 2015-01-01
Supplement: c5cc01367d1.pdf [file c5cc01367d1.pdf]

### *General Experimental Methods*

All reagents and solvents were of commercial reagent grade and were used without further purification except where noted. Dry THF was obtained by refluxing and distillation over pressed Sodium metal. Column chromatography was performed on silica gel (230-400) in glass columns.  $^1\text{H}$  NMR and  $^{19}\text{F}$  NMR spectra were recorded either on a JEOL 400 MHz or Bruker 500 MHz spectrometer, and chemical shifts were reported as the delta scale in ppm relative to  $(\text{CH}_3)_2\text{SO}$  ( $\delta = 2.50$  ppm) or  $(\text{CH}_3)_2\text{CO}$  ( $\delta = 2.1$  ppm) as internal reference for  $^1\text{H}$ . High Resolution Mass spectra were obtained using WATERS G2 Synapt Mass Spectrometer. Electronic spectra were recorded on a Perkin-Elmer »-900 ultraviolet-visible (UV-vis) spectrophotometer. Single crystals were grown in suitable organic solvent and Single crystal X-ray diffraction were performed at 100K on BRUKER KAPPA APEX II CCD Duo diffractometer (operated at 1500 W power: 50 kV, 30 mA) using graphite-monochromated Mo  $\text{K}\alpha$  radiation ( $\lambda = 0.71073$  Å). Quantum mechanical calculations were carried out on Gaussian 03<sup>[12]</sup> program suite using High Performance Computing Cluster facility of IISER PUNE. All calculations were carried out by Density Functional Theory (DFT) with Becke's three-parameter hybrid exchange functional and the Lee-Yang-Parr correlation functional (B3LYP) and 6-31G(d,p) basis set for all the atoms were employed in the calculations. To estimate the NICS(0) values at the centre of the seven membered rings of molecular plane of all the macrocycles, the gauge independent atomic orbital (GIAO) method used based on the optimized geometries. The molecular structures obtained from single crystal analysis were used for geometry optimization. Cyclic voltammetry (CV) and Differential pulse voltammetry (DPV) measurements were carried out on a BAS electrochemical system using a conventional three-electrode cell in dry  $\text{CH}_2\text{Cl}_2$  containing 0.1 M tetrabutylammonium perchlorate (TBAP) as the supporting electrolyte. Measurements were carried out under an Ar atmosphere. A glassy carbon (working electrode), a platinum wire (counter electrode), and saturated calomel (reference electrode) were used.

### Reference:

13. Gaussian 03, Revision C.02, M. J. Frisch, G. W. Trucks, H. B. Schlegel, G. E. Scuseria, M. A. Robb, J. R. Cheeseman, J. A. Montgomery, Jr., T. Vreven, K. N. Kudin, J. C. Burant, J. M. Millam, S. S. Iyengar, J. Tomasi, V. Barone, B. Mennucci, M. Cossi, G. Scalmani, N. Rega, G. A. Petersson, H. Nakatsuji, M. Hada, M. Ehara, K. Toyota, R. Fukuda, J. Hasegawa, M. Ishida, T. Nakajima, Y. Honda, O. Kitao, H. Nakai, M. Klene, X. Li, J. E. Knox, H. P. Hratchian, J. B. Cross, V. Bakken, C. Adamo, J. Jaramillo, R. Gomperts, R. E. Stratmann, O. Yazyev, A. J. Austin, R. Cammi, C. Pomelli, J. W. Ochterski, P. Y. Ayala, K. Morokuma, G. A. Voth, P. Salvador, J. J. Dannenberg, V. G. Zakrzewski, S. Dapprich, A. D. Daniels, M. C. Strain, O. Farkas, D. K. Malick, A. D. Rabuck, K. Raghavachari, J. B. Foresman, J. V. Ortiz, Q. Cui, A. G. Baboul, S. Clifford, J. Cioslowski, B. B. Stefanov, G. Liu, A. Liashenko, P. Piskorz, I. Komaromi, R. L. Martin, D. J. Fox, T. Keith, M. A. Al-Laham, C. Y. Peng, A. Nanayakkara, M. Challacombe, P. M. W. Gill, B. Johnson, W. Chen, M. W. Wong, C. Gonzalez, and J. A. Pople, Gaussian, Inc., Wallingford CT, 2004.

**Procedure for Synthesis 4:** *Meso*-pentafluorophenyl doubly N-confused dipyrromethane (DNCDPM) was synthesized as per literature procedure. To a DNCDPM (300 mg, 0.9615 mmol, 1 equiv.), 10ml dry THF was added under N<sub>2</sub> inert atmosphere followed by addition of DDQ (480 mg, 2.1154 mmol, 2.2 equiv.). After stirring reaction mixture for one hour, copper(II) acetate (173 mg, 0.9615 mmol, 1 equiv.) was added and the reaction mixture was stirred for overnight. Reaction was quenched with 100ml distilled water and organic phase was extracted thrice with dichloromethane. The combined dichloromethane extracts was washed with water, dried over Na<sub>2</sub>SO<sub>4</sub> and evaporated under vacuo. The crude product was purified by silica gel column chromatography using hexane/ethyl acetate as the eluent and pink color solution obtained as **4** (12mg, 4%).

It has been found that, this compound has poor solubility in common organic solvents hence hampered the <sup>13</sup>C-NMR studies.

**<sup>1</sup>H-NMR** (Acetone-d<sub>6</sub>, 400MHz, 295K)  $\delta$  = 6.84 (d, J = 4.0 Hz, 2H), 7.79 (d, J = 4.0 Hz, 2H), 7.96 (d, J = 4.0 Hz, 2H), 9.53 (d, J = 4.0 Hz, 2H). **<sup>19</sup>F-NMR** (Acetone-d<sub>6</sub>, 376MHz, 295K)  $\delta$  = -141.62 (d, J = 11.28 Hz, 4F), -153.93 (t, J = 15.04 Hz, 2F), -162.07 (t, J = 15.04 Hz, 4F). **UV-Vis** (CH<sub>2</sub>Cl<sub>2</sub>):  $\lambda_{\text{max}}$ ( $\mu$ )L mol<sup>-1</sup>cm<sup>-1</sup> = 262 nm(17,800), 280 nm(17,800), 361 nm(10,000) and 514 nm(6,700). **HRMS** *m/z* calcd. for (C<sub>30</sub>H<sub>8</sub>N<sub>4</sub>F<sub>10</sub>+H)<sup>+</sup> = 615.0668, Observed = 615.0664. **Crystal data:** C<sub>30</sub>H<sub>8</sub>N<sub>4</sub>F<sub>10</sub> (*M<sub>r</sub>* = 614.40), triclinic, space group *P*-1 (*No.*2), *a* = 5.996(2), *b* = 7.348(3), *c* = 13.198(5)Å,  $\alpha$  = 87.325(8),  $\beta$  = 86.010(8),  $\gamma$  = 71.490(8)°, *V* = 549.9(4)Å<sup>3</sup>, *Z* = 1,  $\rho_{\text{calcd}}$  = 1.855 mg/m<sup>3</sup>, *T* = 100K, *R*<sub>int</sub> (all data) = 0.0385, *R*<sub>1</sub>(all data) = 0.0576, *R*<sub>w</sub> (all data) = 0.1124, GOF = 1.043

**Procedure for Synthesis 5:** DNCDPM (100 mg, 0.3205 mmol, 1 equiv.) were dissolved in 100ml dry THF under inert atmosphere of N<sub>2</sub> and DDQ (160 mg, 0.7051 mmol, 2.2 equiv) was added. After one hour, Iron(III) acetylacetonate (113 mg, 0.3205 mmol, 1 equiv.) was added and the reaction mixture stirred overnight. Furthermore, reaction mixture was passed through bed of basic alumina. The first fraction afforded pink color solution of **4** (5mg, 5%) in dichloromethane and second fraction provided dark color solution in methanol/dichloromethane combination which was further purified by silica gel column chromatography using hexane/ethyl acetate as a eluent to give greenish yellow color solution as **5** (10 mg, 10%).

**<sup>1</sup>H-NMR** (DMSO-*d*<sub>6</sub>, 400MHz, 295K)  $\delta$  = 6.28 (d, J = 4.0 Hz, 1H), 6.73 (d, J = 4.0 Hz, 1H), 7.19 (d, J = 4.0 Hz, 1H), 7.50 (d, J = 4.0 Hz, 1H), 7.82 (d, J = 4.0 Hz, 1H), 8.71 (s, 1H), 9.28 (d, J = 4.0 Hz, 1H), 13.46 (bs, 1H, exchangeable with D<sub>2</sub>O). **<sup>19</sup>F-NMR** (DMSO-*d*<sub>6</sub>, 376MHz, 295K)  $\delta$  = -142.41 (d, J = 22.56 Hz, 4F), -155.63 (td, J = 15.04 Hz, 2F), -162.89 (td, J = 15.04 Hz, 4F). **UV-Vis** (CH<sub>2</sub>Cl<sub>2</sub>):  $\lambda_{\text{max}}$ ( $\mu$ )L mol<sup>-1</sup>cm<sup>-1</sup> = 268 nm (32,600) 282 nm(32,500), 346 nm(33,600) and 451 nm(8,800). **HRMS** *m/z* calcd. for (C<sub>30</sub>H<sub>8</sub>N<sub>4</sub>F<sub>10</sub>+H)<sup>+</sup> = 615.0668, Observed = 615.0667. **Crystal data:** C<sub>30</sub>H<sub>8</sub>N<sub>4</sub>F<sub>10</sub>O<sub>1</sub> (*M<sub>r</sub>* = 630.40), monoclinic, space group *P*21/*c* (*No.*14), *a* = 28.021(12), *b* = 11.565(3), *c* = 7.319(3)Å,  $\beta$  = 90.00,  $\alpha$  = 95.576(10),  $\gamma$  = 90.00°, *V* = 2360.6(17)Å<sup>3</sup>, *Z* = 4,  $\rho_{\text{calcd}}$  = 1.774 mg/m<sup>3</sup>, *T* = 100K, *R*<sub>int</sub> (all data) = 0.0793, *R*<sub>1</sub>(all data) = 0.1812, *R*<sub>w</sub> (all data) = 0.2303, GOF = 1.112.

**Procedure for Synthesis Me-5:** To a **5** (100 mg, 0.1628 mmole, 1 equiv.) in 5 ml dry dimethyl formamide under N<sub>2</sub> inert atmosphere, sodium hydride(1 equiv.) was added at 0<sup>o</sup>C. After 30 minute, methyl iodide (1.5 equiv.) was added and reaction mixture brought to room temperature. Reaction mixture quenched with ice cold distilled water and organic compound was extracted with ethyl acetate from ice cold reaction mixture. The organic layer was evaporated on rota evaporator to get crude solid which was further purified on silica gel in ethyl acetate/n-hexane combination to get yellowish colored compound **Me-5** (55 mg ,54%).

<sup>1</sup>**H-NMR** (Acetone-*d*<sub>6</sub>, 400MHz, 295K)  $\delta$  = 4.75 (s, 3H), 6.28 (d, J = 4.0 Hz, 1H), 6.72 (d, J = 4.0 Hz, 1H), 7.21 (d, J = 4.0 Hz, 1H), 7.42 (d, J = 4.0 Hz, 1H), 7.77 (d, J = 4.0 Hz, 1H), 8.66 (s, 1H), 9.35 (s, 1H). <sup>19</sup>**F-NMR** (Acetone-*d*<sub>6</sub>, 376MHz, 295K)  $\delta$  = -140.01 (d, J = 76.96 Hz, 4F), -152.84 (d, J = 221.84 Hz, 2F), -160.65 (d, J = 206.80 Hz, 4F). **UV-Vis** (CH<sub>2</sub>Cl<sub>2</sub>):  $\epsilon_{\text{max}}(\mu\text{L mol}^{-1}\text{cm}^{-1}) = 261 \text{ nm}(43,900), 285 \text{ nm}(38,700) 351 \text{ nm}(51,200) \text{ and } 465 \text{ nm}(13,000)$ . **HRMS** m/z calcd. for (C<sub>31</sub>H<sub>10</sub>N<sub>4</sub>F<sub>10</sub>+H)<sup>+</sup> = 629.0824, Observed = 629.0835. **Crystal data:** C<sub>31</sub>H<sub>10</sub>N<sub>4</sub>F<sub>10</sub> (Mr = 628.43), triclinic, space group P 1 (No.1), a = 6.1461(11), b = 7.3648(13), c = 14.031(3)Å,  $\alpha = 76.834(4)^\circ$ ,  $\beta = 82.082(4)^\circ$ ,  $\gamma = 72.763(4)^\circ$ , V = 589.0(2)Å<sup>3</sup>, Z = 1,  $\rho_{\text{calcd}} = 1.772 \text{ mg/m}^3$ , T = 100K, Rint (all data) = 0.0484, R1(all data) = 0.0927, RW (all data) = 0.1616, GOF = 0.963

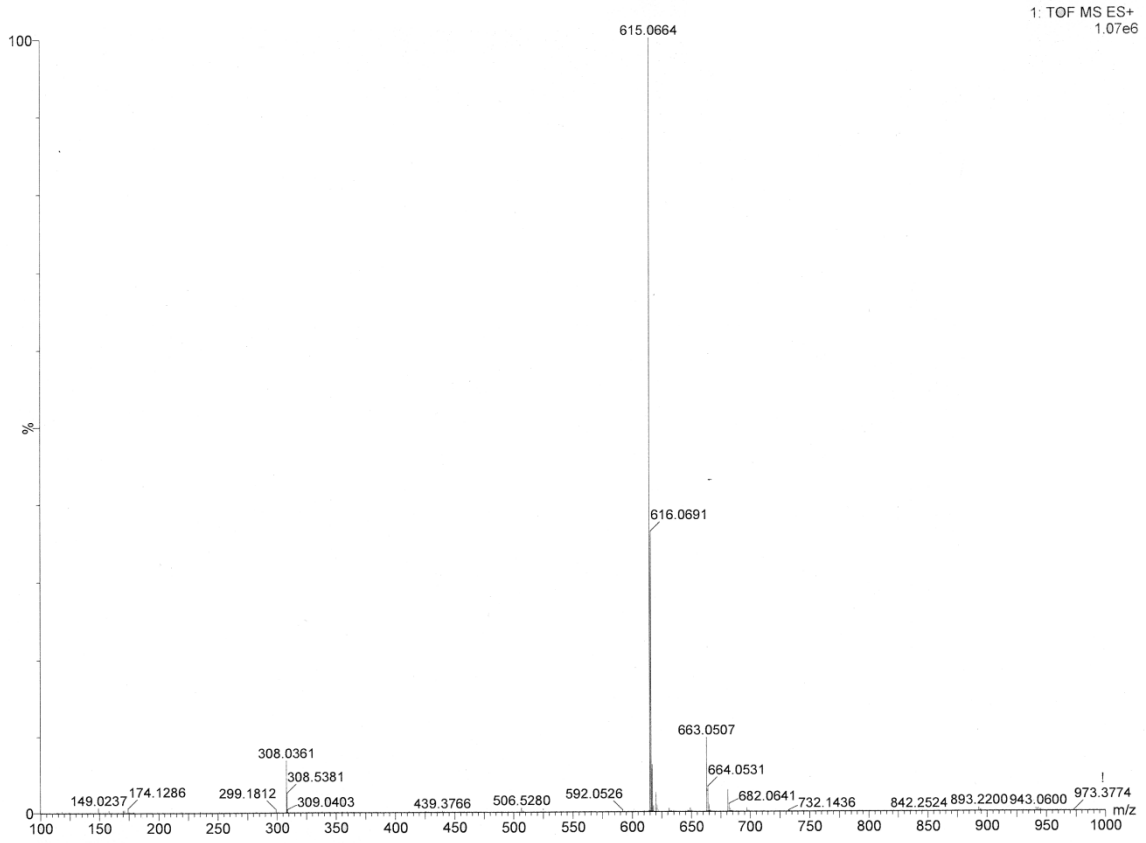

S1: HR-ESI-TOF mass spectrum of 4.

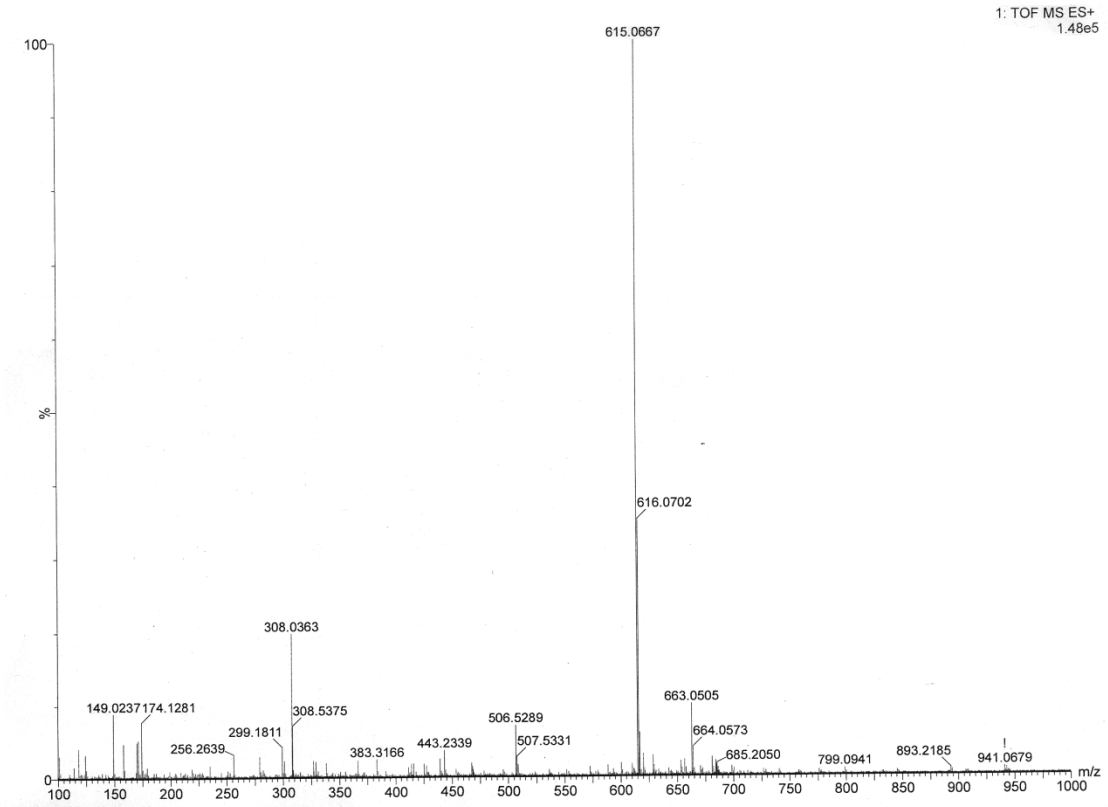

S2: HR-ESI-TOF mass spectrum of 5.

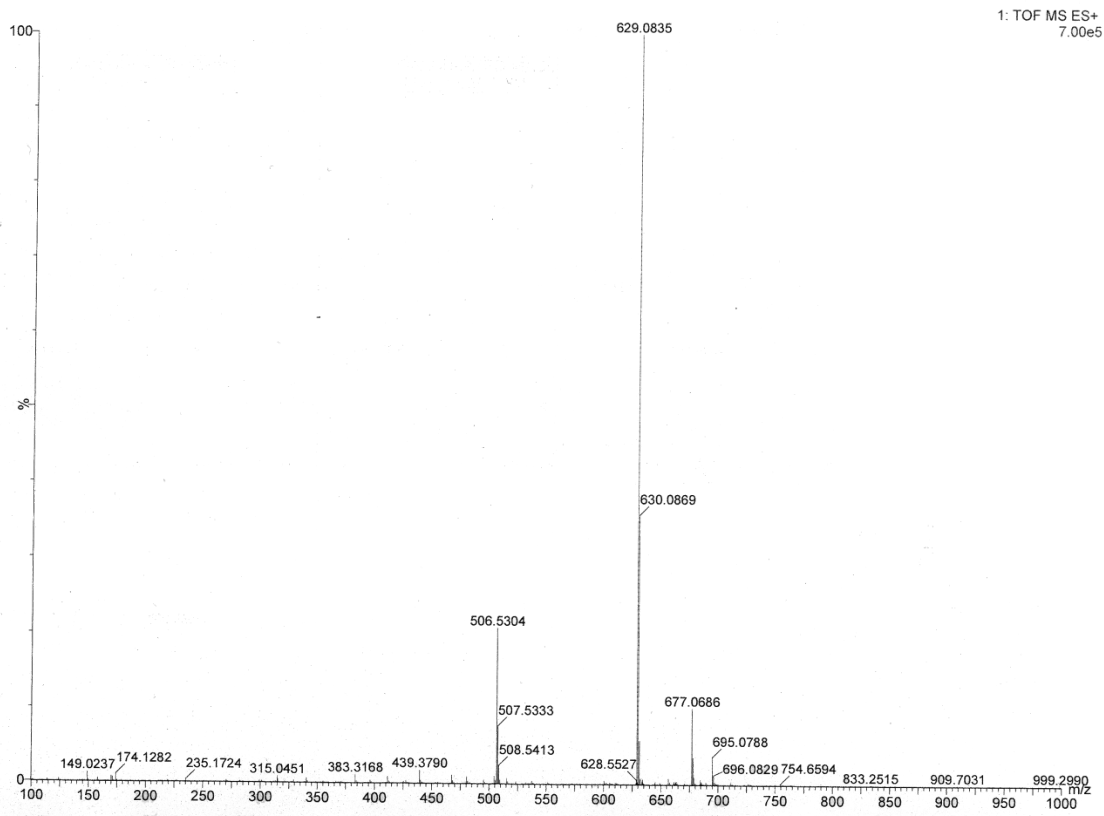

S3: HR-ESI-TOF mass spectrum of Me-5.

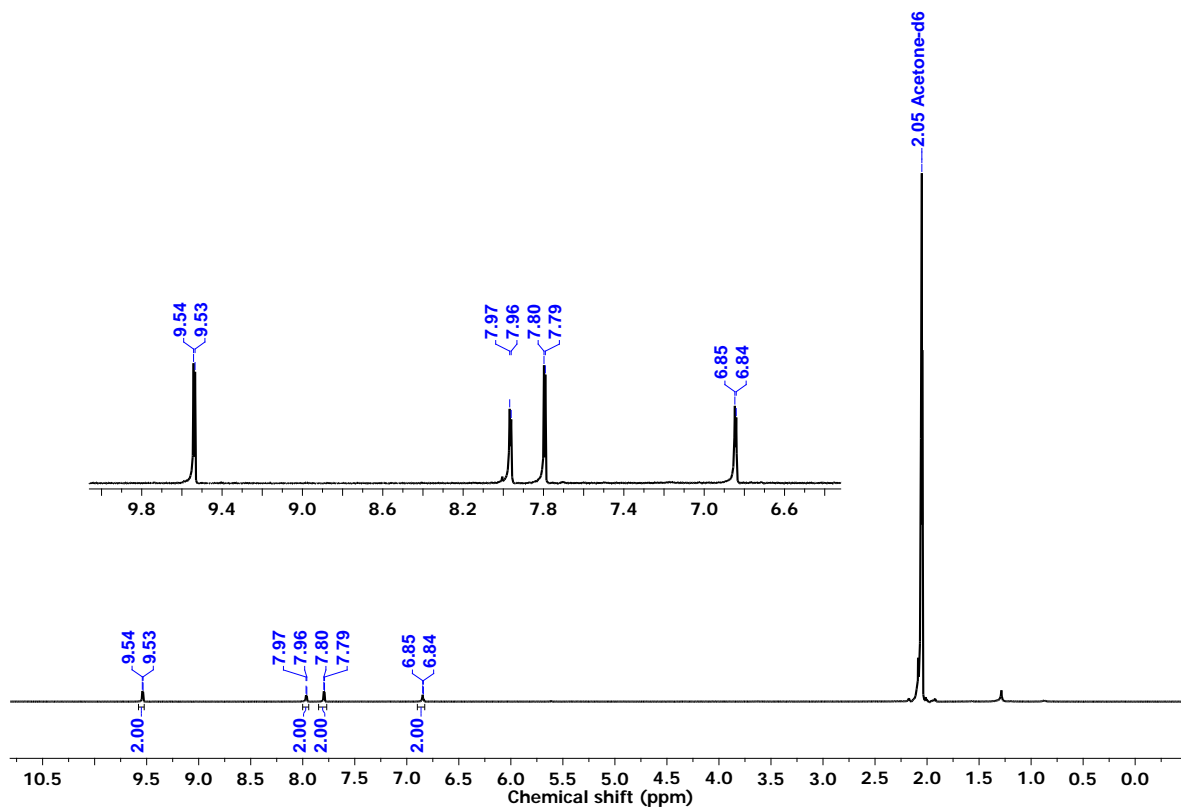

S4:  $^1\text{H-NMR}$  spectrum of 4 in  $\text{Acetone-d}_6$  at 295K.

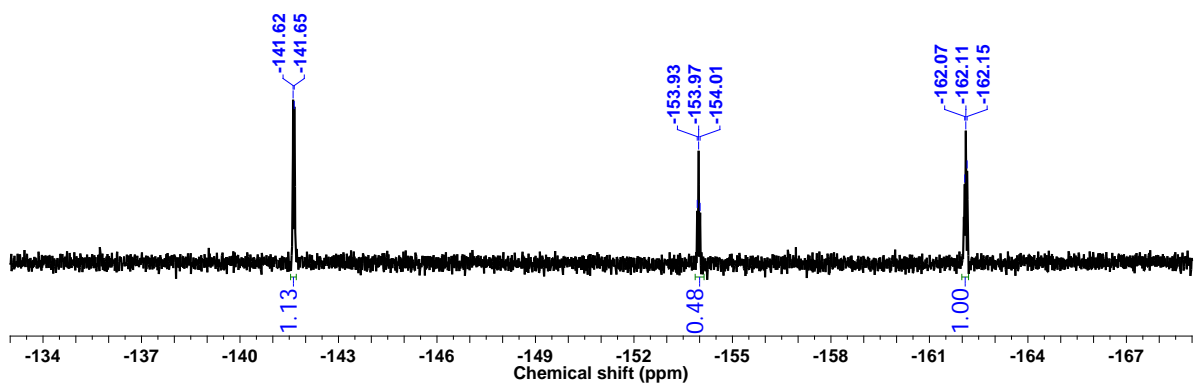

S5:  $^{19}\text{F}$ -NMR spectrum of **4** in *Acetone-d*<sub>6</sub> at 295K.

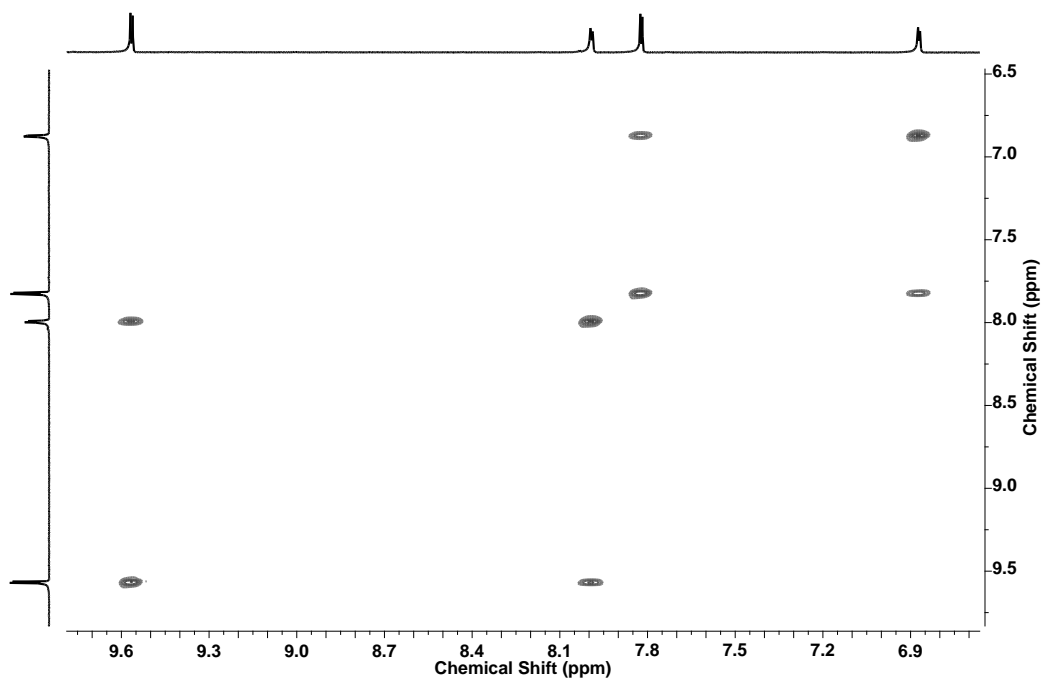

S6:  $^1\text{H}$ - $^1\text{H}$  COSY spectrum of **4** in *Acetone-d*<sub>6</sub> at 295K.

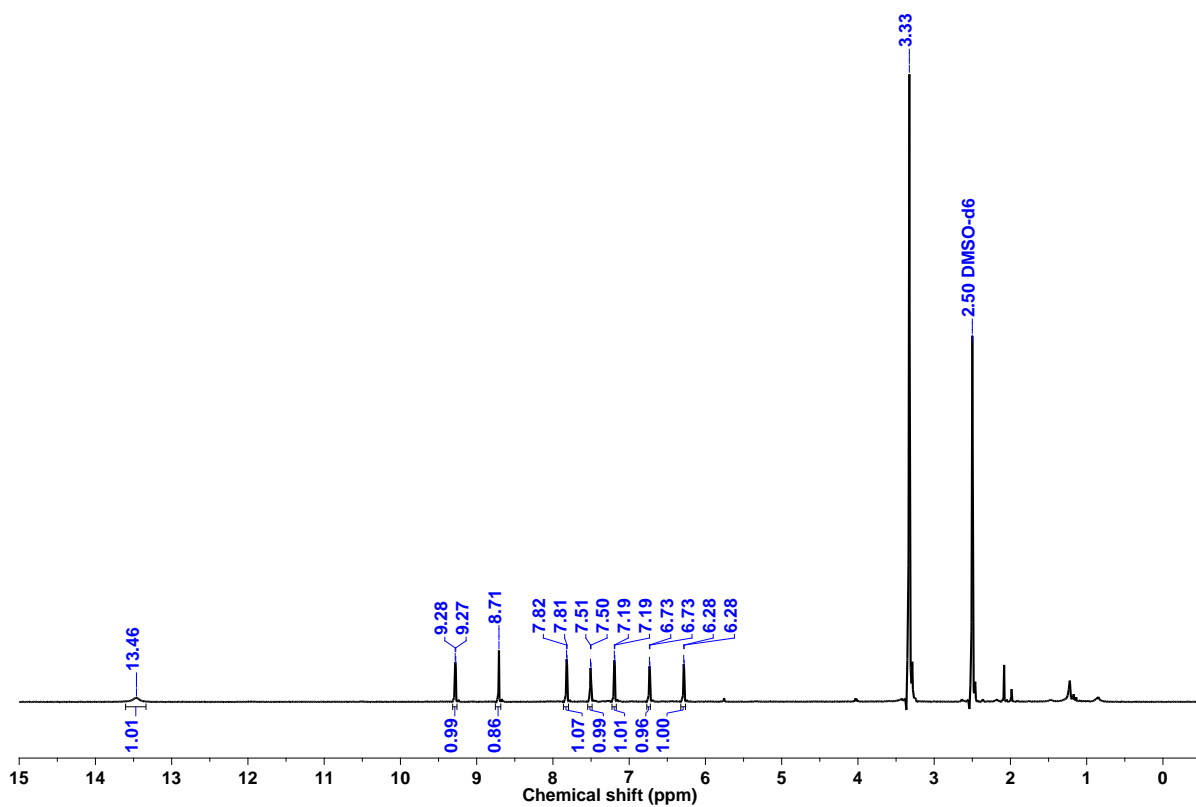

S7:  $^1\text{H-NMR}$  spectrum of **5** in *Dimethyl Sulphoxide- $d_6$*  at 295K.

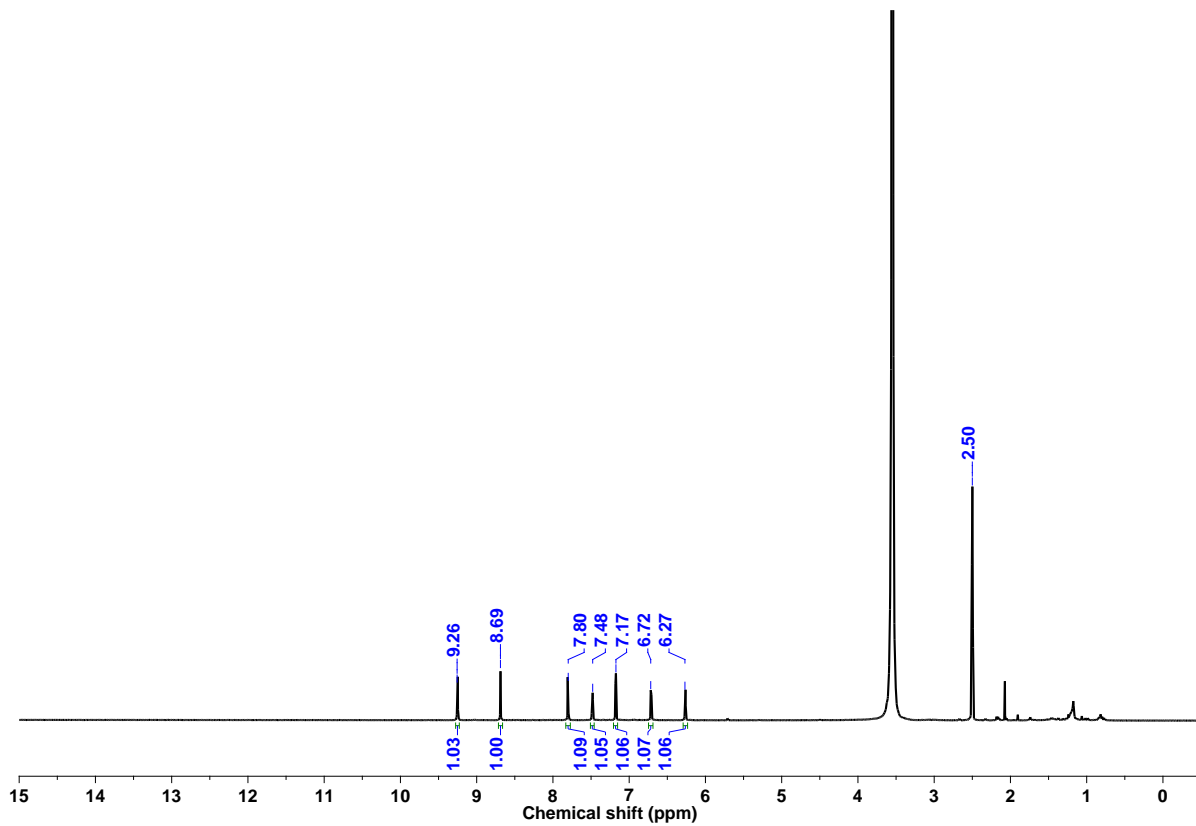

S8:  $^1\text{H-NMR}$  spectrum of **5** after  $\text{D}_2\text{O}$  exchange in *Dimethyl Sulphoxide- $d_6$*  at 295K.

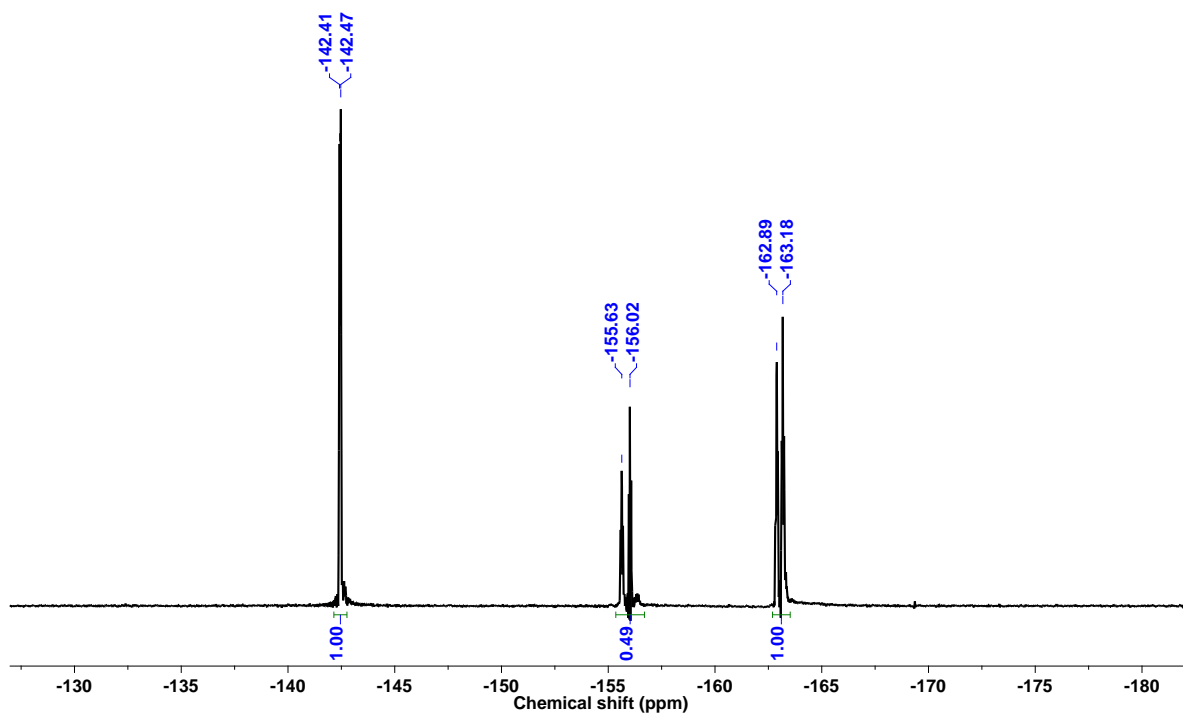

S9:  $^{19}\text{F}$ -NMR spectrum of **5** in *Dimethyl Sulphoxide-d<sub>6</sub>* at 295K.

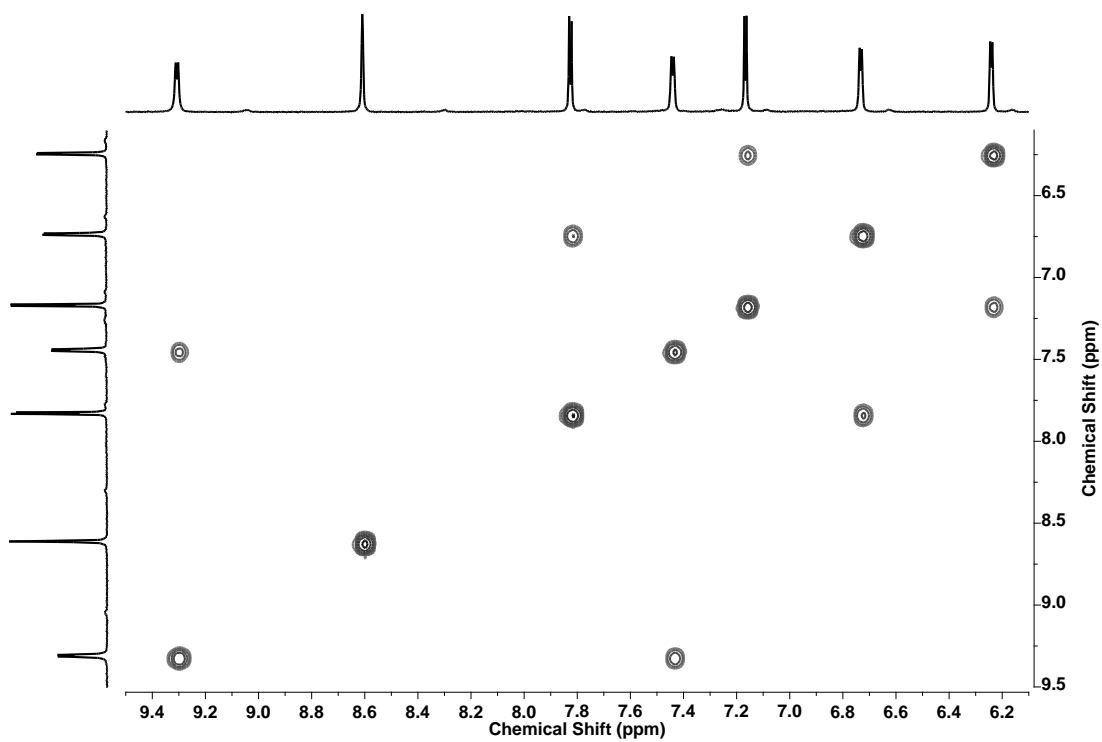

S10:  $^1\text{H}$ - $^1\text{H}$  COSY spectrum of **5** in *Dimethyl Sulphoxide-d<sub>6</sub>* at 295K.



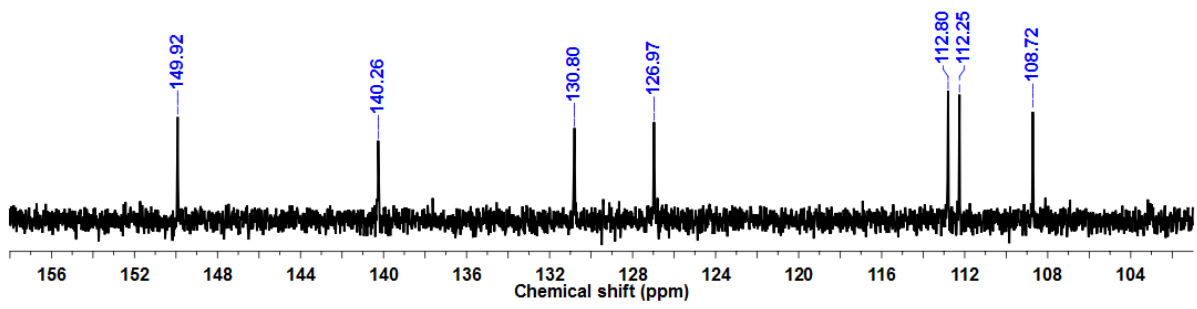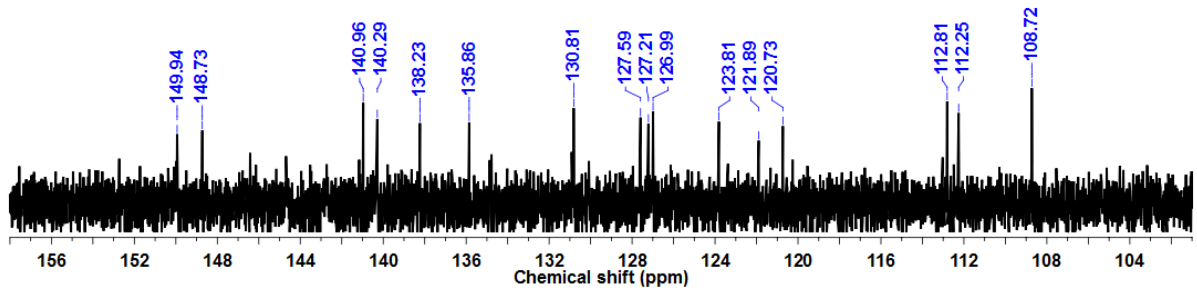

S11: (Top) DEPT-90 and (Bottom)  $^{13}\text{C}$ -NMR spectrum of **5** in *Dimethyl Sulphoxide-d<sub>6</sub>* at 295K.

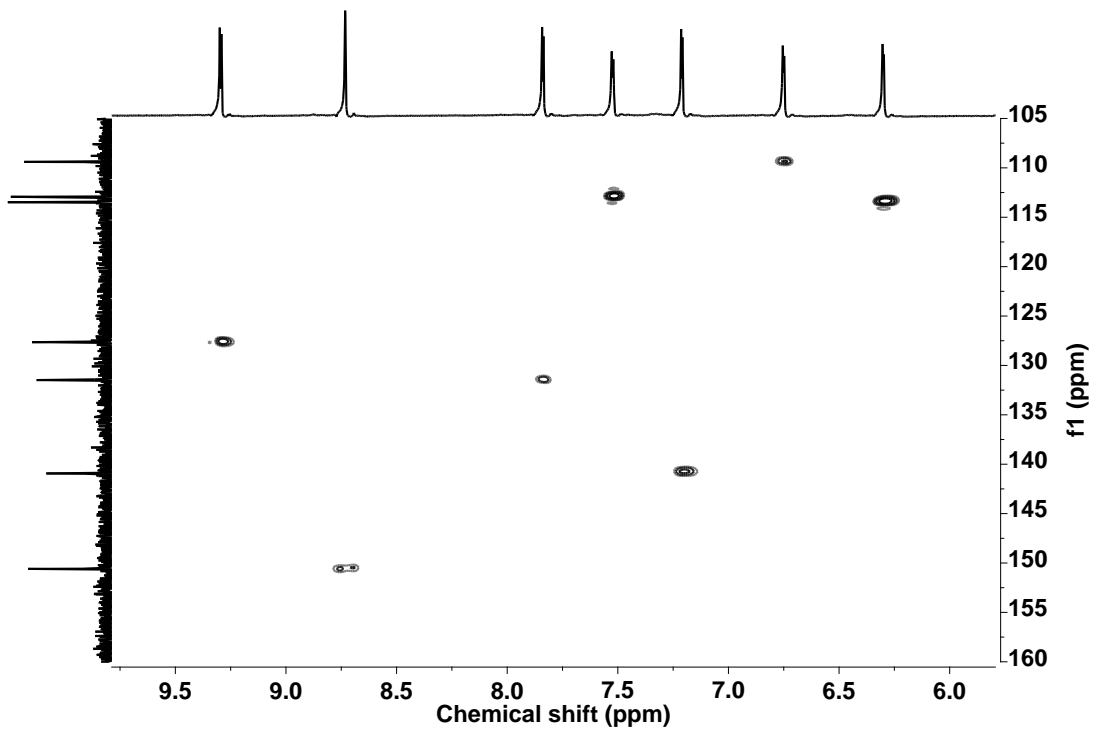

S12: HMBC spectrum of **5** in *Dimethyl Sulphoxide-d<sub>6</sub>* at 295K.

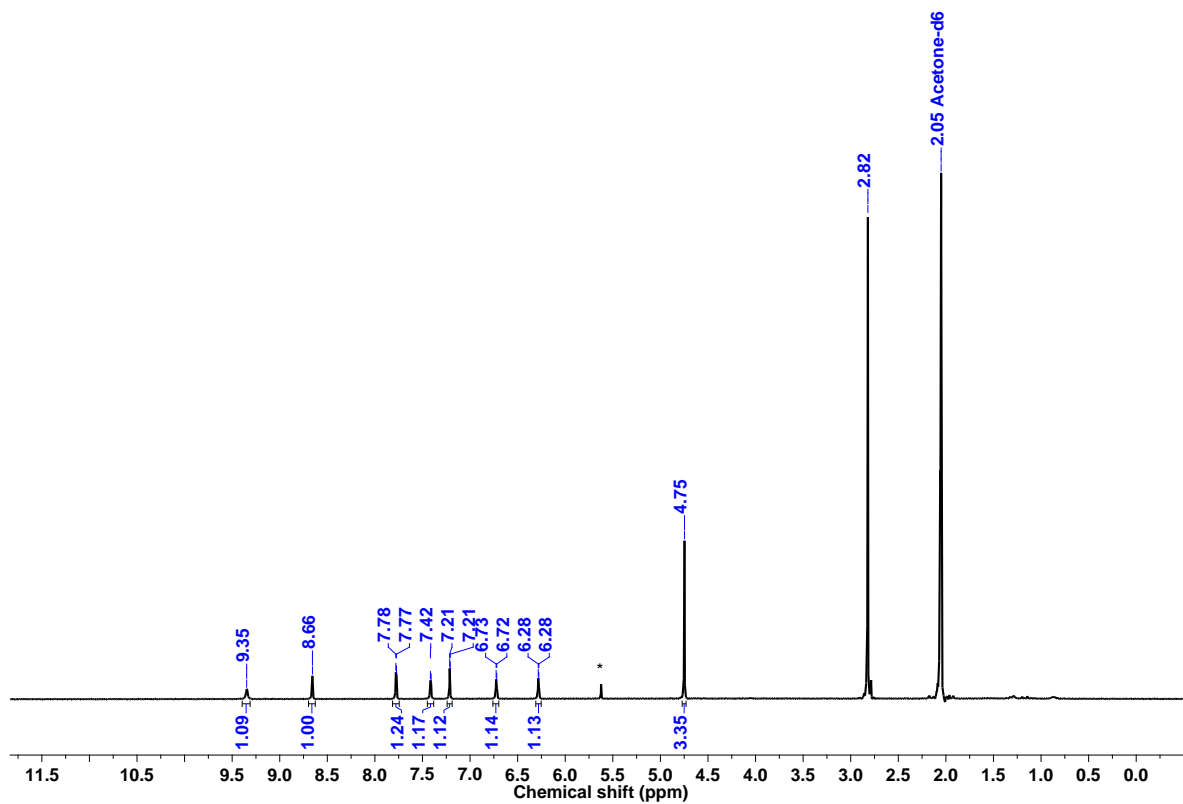

S13:  $^1\text{H-NMR}$  spectrum of **Me-5** in *Acetone-d<sub>6</sub>* at 295K.

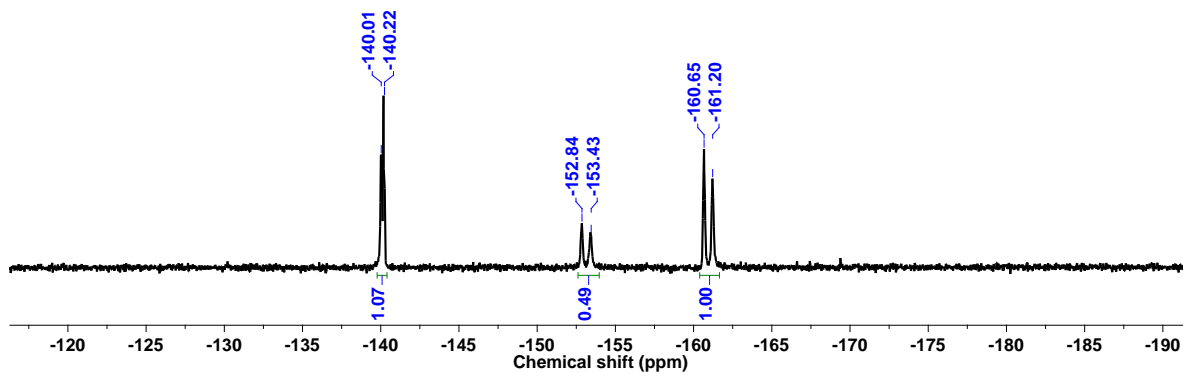

S14:  $^{19}\text{F-NMR}$  spectrum of **Me-5** in *Acetone-d<sub>6</sub>* at 295K.

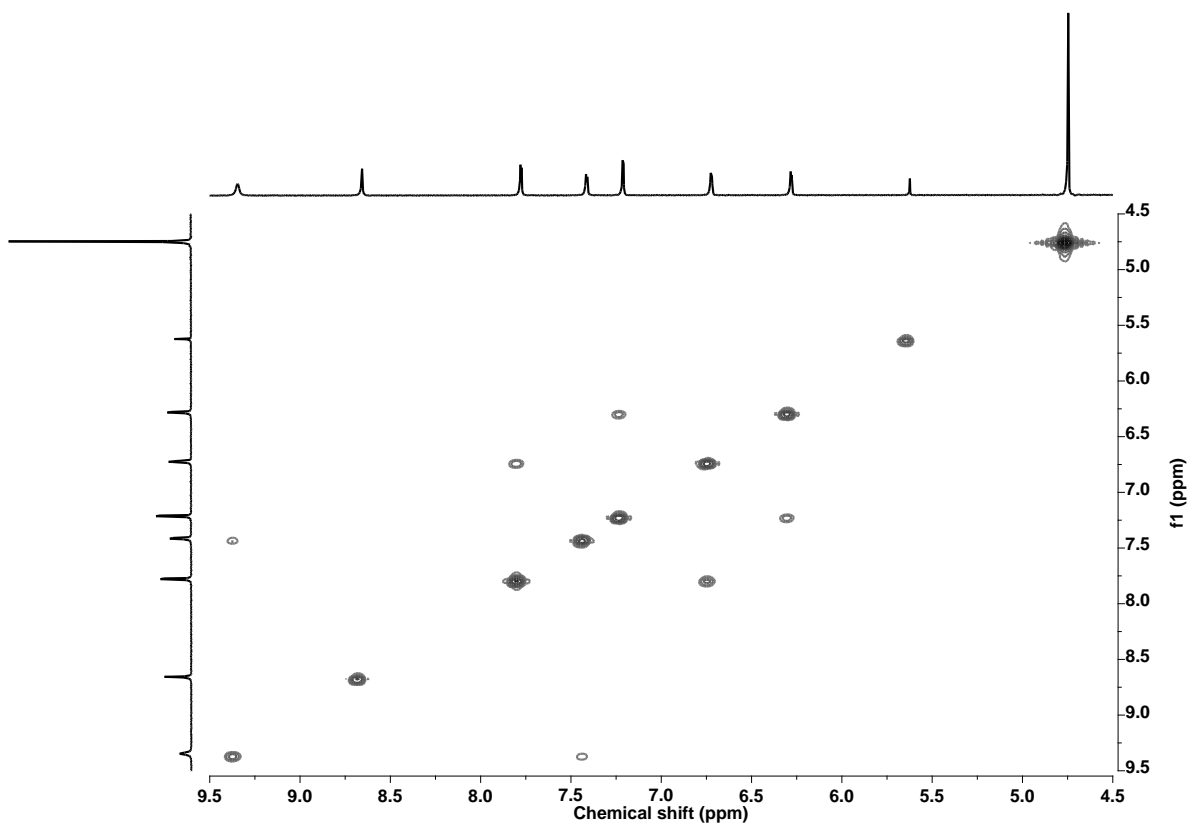

**S15:**  $^1\text{H}$ - $^1\text{H}$  COSY spectrum of **Me-5** in *Acetone-d*<sub>6</sub> at 295K.

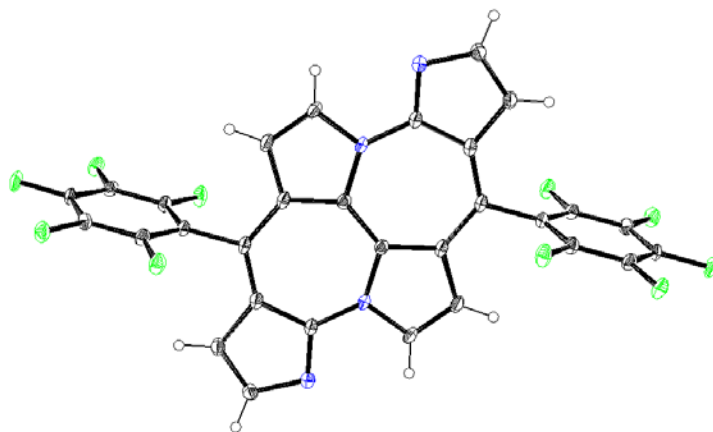

**S16:** ORTEP drawings of (top view) **4**. The thermal ellipsoids are scaled to the 50% probability level.

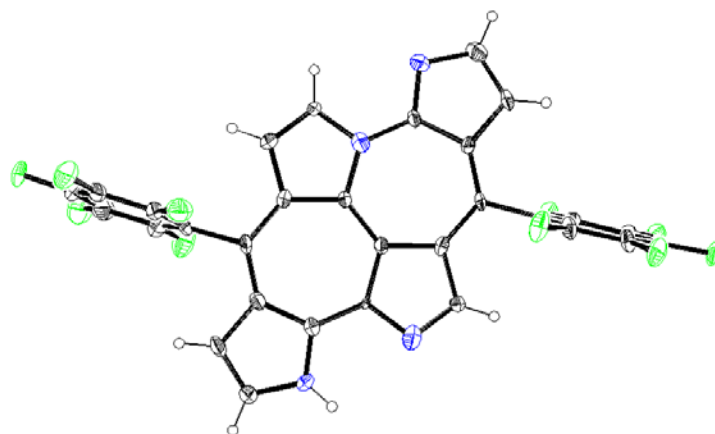

**S17:** ORTEP drawings of (top view) **5**. The thermal ellipsoids are scaled to the 50% probability level.

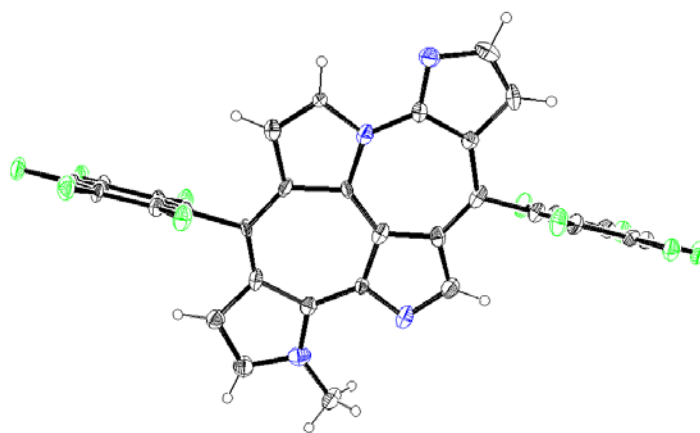

**S18:** ORTEP drawings of (top view) **Me-5**. The thermal ellipsoids are scaled to the 50% probability level.

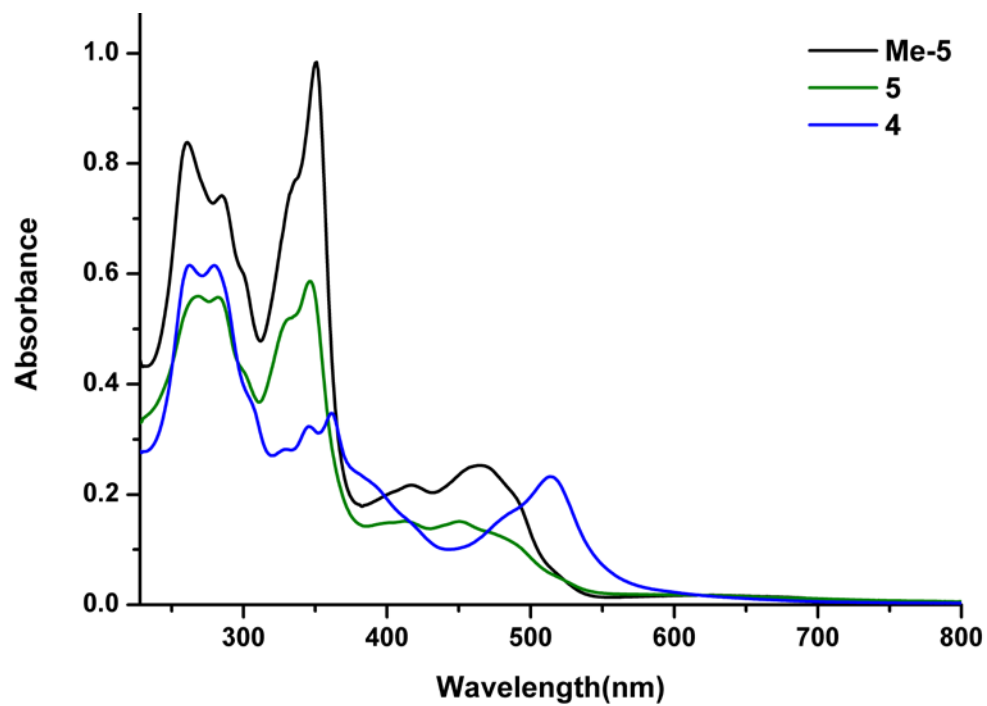

**S19:** UV-Visible spectrum of **4**, **5** and **Me-5** at  $\sim 10^{-6}$  M in dichloromethane at 295K.

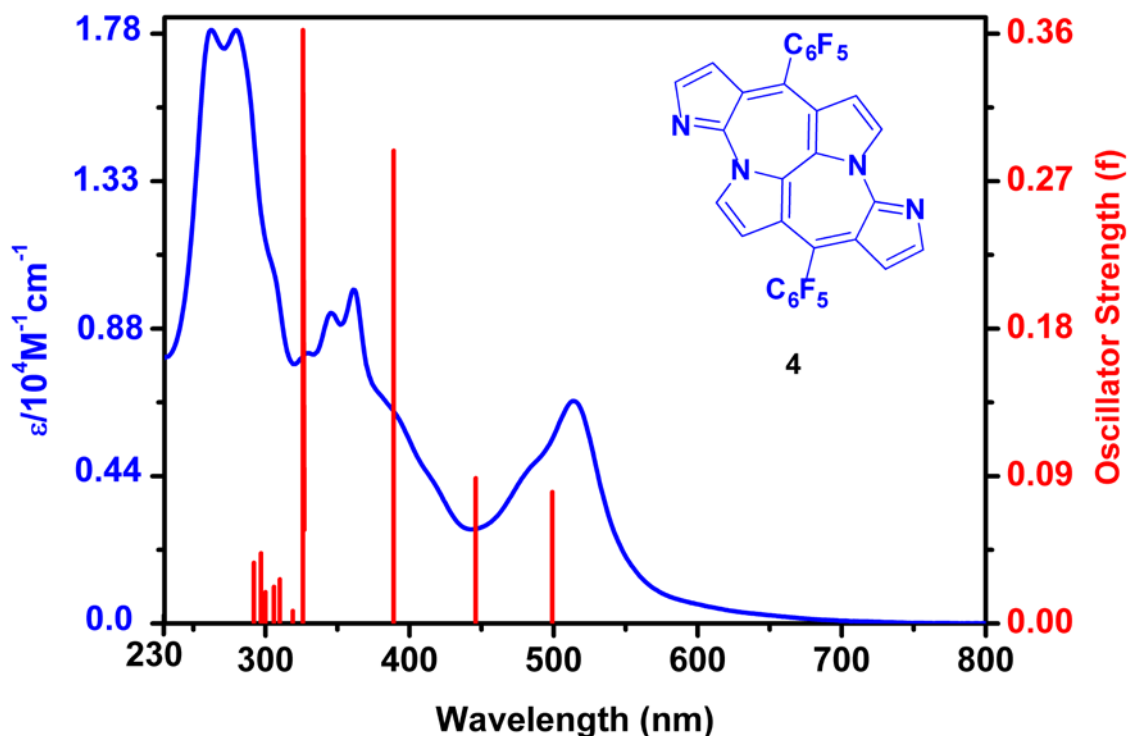

**S20:** The steady state absorption spectra (blue line) of **4** recorded in CH<sub>2</sub>Cl<sub>2</sub> along with the theoretical vertical excitation energies (red bar) obtained from TD-DFT calculations carried out at the B3LYP/6-31G(d,p) level.

| Energy (cm-1) | Wavelength (nm) | Osc. Strength (f) | Major contributions                                           |
|---------------|-----------------|-------------------|---------------------------------------------------------------|
| 30713.8048    | 325.5864933     | 0.3623            | HOMO→L+2 (77%)                                                |
| 25679.25728   | 389.4193625     | 0.2886            | H-2→LUMO (76%), HOMO→L+1 (15%)                                |
| 22400.59088   | 446.4167956     | 0.0888            | H-1→L+1 (91%)                                                 |
| 20050.27504   | 498.7462756     | 0.0803            | H-2→LUMO (19%), HOMO→L+1 (77%)                                |
| 30616.21104   | 326.624349      | 0.0573            | H-7→LUMO (29%), H-6→L+1 (37%), H-5→LUMO (11%)                 |
| 33714.208     | 296.6108532     | 0.043             | H-9→LUMO (15%), H-7→LUMO (20%), H-6→L+1 (52%)                 |
| 34284.44592   | 291.677457      | 0.0371            | H-10→L+1 (23%), H-9→LUMO (31%), H-8→L+1 (12%), H-7→LUMO (28%) |
| 32249.49504   | 310.0823745     | 0.027             | HOMO→L+3 (95%)                                                |
| 32656.00128   | 306.222428      | 0.0224            | H-5→LUMO (37%), H-3→LUMO (19%), H-1→L+2 (27%)                 |
| 33360.12816   | 299.7590403     | 0.0192            | H-5→LUMO (16%), H-4→L+1 (52%), H-3→LUMO (28%)                 |
| 31379.2168    | 318.6822687     | 0.0077            | H-4→L+1 (44%), H-3→LUMO (43%)                                 |

**S21:** Selected TD-DFT (B3LYP/6-31g (d, p)) calculated energies, oscillator strengths and compositions of the major electronic transitions of **4**.

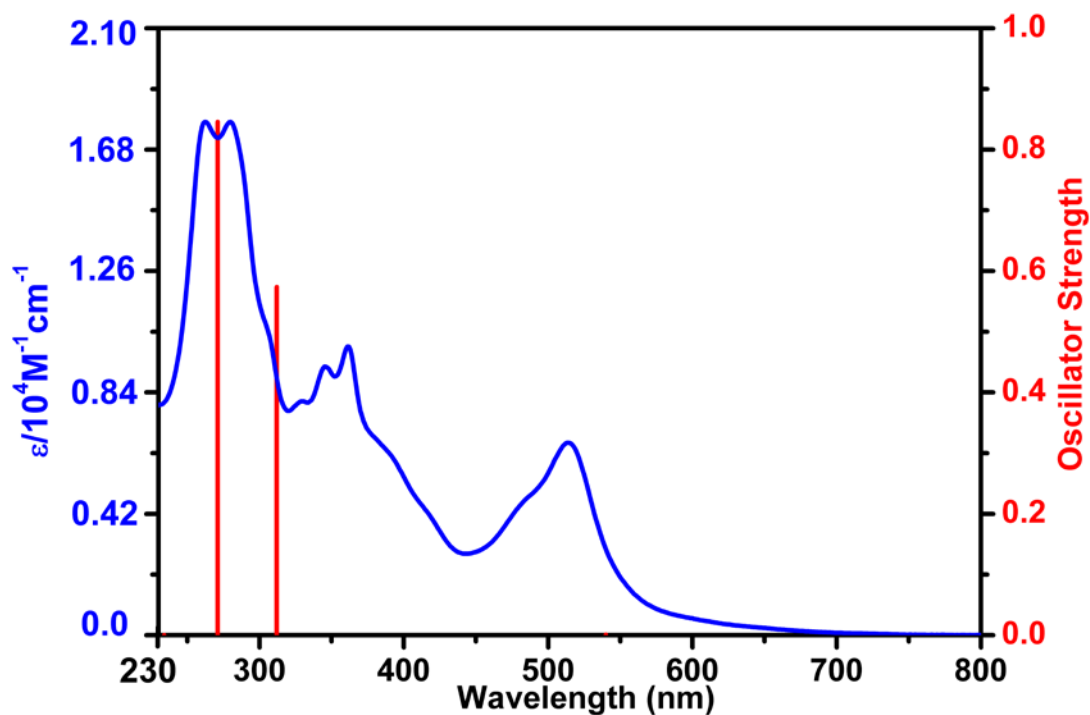

**S22:** The steady state absorption spectra (blue line) of **4** recorded in CH<sub>2</sub>Cl<sub>2</sub> and theoretical vertical excitation energies (red bar) for central fused seven membered bicyclic system **4** obtained from TD-DFT calculations carried out at the B3LYP/6-31G(d,p) level.

| Energy (cm-1) | Wavelength (nm) | Osc. Strength (f) | Major contribs                                 |
|---------------|-----------------|-------------------|------------------------------------------------|
| 36886.40848   | 271.1025663     | 0.8458            | H-1L+1 (51%)<br>H-1→LUMO (12%), H-1→L+1 (28%), |
| 31950.26128   | 312.9864858     | 0.5737            | HOMO→L+1 (25%)                                 |
| 18500.87328   | 540.5150259     | 0.0008            | H-1→LUMO (63%), HOMO→L+1 (41%)                 |
| 42612.17792   | 234.6746984     | 0.0001            | HOMO→L+4 (98%)                                 |

**S23:** Selected TD-DFT (B3LYP/6-31g (d, p)) calculated energies, oscillator strengths and compositions of the major electronic transitions for central fused seven membered bicyclic system **4**.

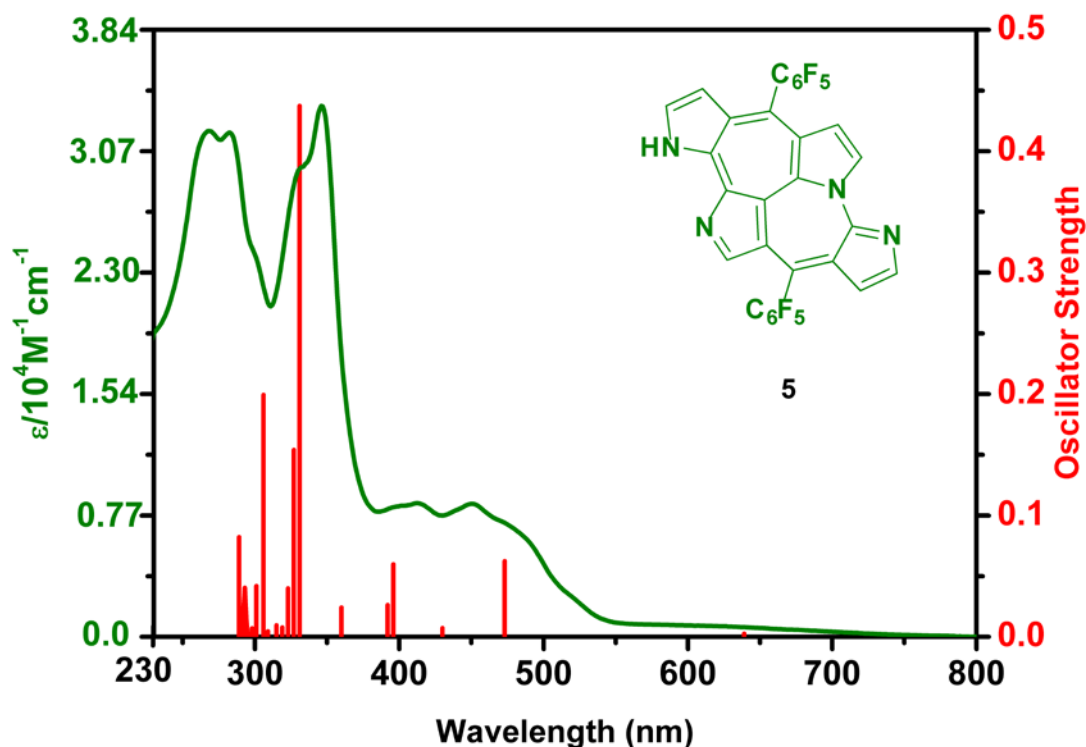

**S24:** The steady state absorption spectra (green line) of **5** recorded in CH<sub>2</sub>Cl<sub>2</sub> along with the theoretical vertical excitation energies (red bar) obtained from TD-DFT calculations carried out at the B3LYP/6-31G(d,p) level.

| Energy (cm-1) | Wavelength (nm) | Osc. Strength(f) | Major contributions                                                          |
|---------------|-----------------|------------------|------------------------------------------------------------------------------|
| 30200.83264   | 331.1166986     | 0.4373           | H-4→LUMO (13%), HOMO→L+2 (35%), HOMO→L+3 (26%)                               |
| 32660.84064   | 306.177055      | 0.1993           | H-6→LUMO (23%), H-4→LUMO (29%), H-1→L+2 (11%), HOMO→L+2 (10%)                |
| 30570.23712   | 327.1155523     | 0.1541           | H-4→LUMO (10%), HOMO→L+3 (71%)                                               |
| 34569.1616    | 289.2751671     | 0.0823           | H-9→LUMO (25%), H-7→LUMO (23%), H-7→L+1 (13%)                                |
| 21125.41952   | 473.3633806     | 0.0625           | HOMO→L+1 (80%)                                                               |
| 25276.78384   | 395.6199516     | 0.0599           | H-1→L+1 (58%), HOMO→L+2 (23%)                                                |
| 33273.01968   | 300.5438068     | 0.0419           | HOMO→L+5 (89%)                                                               |
| 34069.90096   | 293.5142081     | 0.0404           | H-9→LUMO (31%), H-8→LUMO (11%), H-7→LUMO (10%), H-4→L+1 (21%), H-3→L+1 (12%) |
| 30950.12688   | 323.1004525     | 0.04             | H-6→LUMO (29%), H-4→LUMO (26%), H-4→L+1 (14%)                                |
| 25519.5584    | 391.8563105     | 0.0262           | H-2→LUMO (78%)                                                               |
| 27804.54288   | 359.6534582     | 0.0241           | H-2→L+1 (89%)                                                                |
| 34154.58976   | 292.7864182     | 0.0205           | H-8→LUMO (51%), H-7→LUMO (23%)                                               |
| 33969.08096   | 294.3853563     | 0.0151           | HOMO→L+6 (93%)                                                               |
| 31777.65744   | 314.6865064     | 0.0095           | H-3→LUMO (82%), H-3→L+1 (12%)                                                |
| 31309.04608   | 319.3965084     | 0.0077           | HOMO→L+4 (96%)                                                               |
| 23264.41664   | 429.8409951     | 0.0072           | H-1→LUMO (78%), H-1→L+1 (13%)                                                |
| 33602.09616   | 297.6004816     | 0.007            | H-9→LUMO (14%), H-6→LUMO (21%), H-4→L+1 (31%)                                |

**S25:** Selected TD-DFT (B3LYP/6-31g (d, p)) calculated energies, oscillator strengths and compositions of the major electronic transitions of **5**.

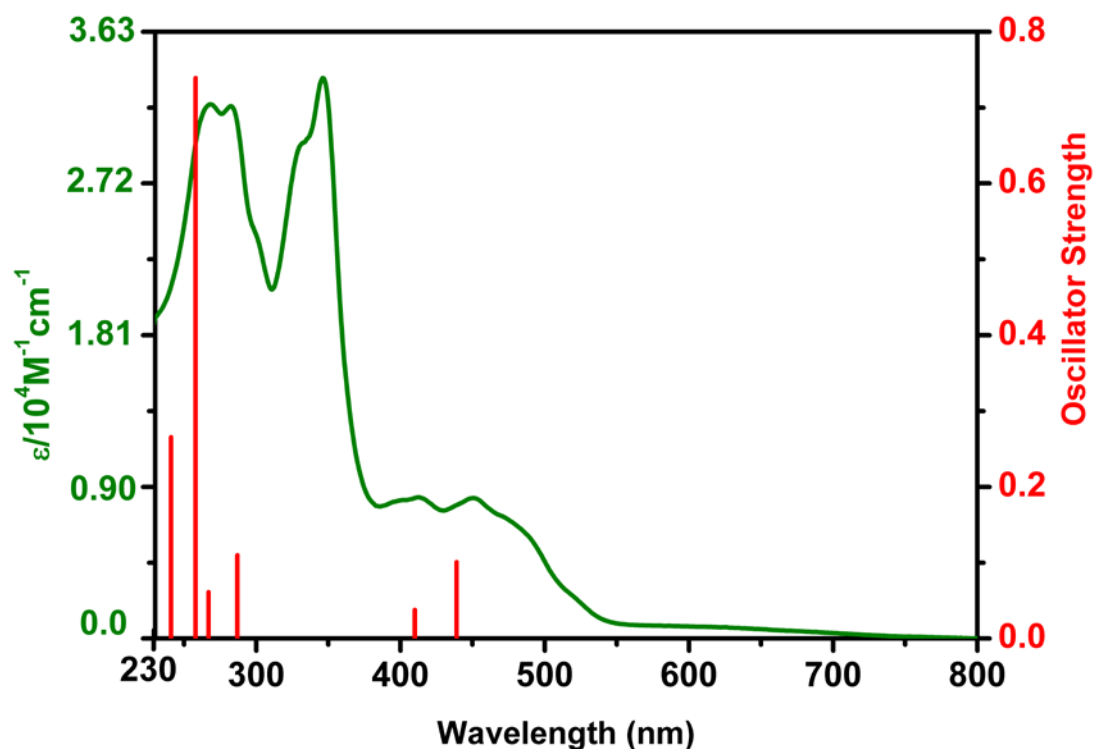

**S26:** The steady state absorption spectra (green line) of **5** recorded in CH<sub>2</sub>Cl<sub>2</sub> and theoretical vertical excitation energies (red bar) for central fused seven membered bicyclic system **5** obtained from TD-DFT calculations carried out at the B3LYP/6-31G(d,p) level .

| Energy (cm-1) | Wavelength (nm) | Osc. Strength (f) | Major contribs                                                                             |
|---------------|-----------------|-------------------|--------------------------------------------------------------------------------------------|
| 20464.84688   | 488.642796      | 0.0015            | H-1(A) →LUMO(A) (20%), HOMO(A) →L+1(A) (62%), HOMO(B) →L+1(B) (22%)                        |
| 24406.5056    | 409.726823      | 0.0015            | H-1(A) →L+1(A) (75%), HOMO(B) →L+2(B) (35%)                                                |
| 25920.41872   | 385.7962369     | 0.1212            | H-1(A) →LUMO(A) (14%), HOMO(A) →L+1(A) (18%), H-1(B) →LUMO(B) (47%), HOMO(B) →L+1(B) (14%) |
| 33028.632     | 302.7676108     | 0.003             | H-2(A) →LUMO(A) (31%), H-1(B) →L+1(B) (59%)                                                |
| 34736.92608   | 287.8780919     | 0.0654            | H-2(B) →LUMO(B) (26%), HOMO(B) →L+2(B) (44%)                                               |
| 35461.21696   | 281.9982183     | 0.6233            | HOMO(A) →L+1(A) (13%), H-1(B) →LUMO(B) (35%)                                               |
| 36633.9552    | 272.9707984     | 0.003             | HOMO(A) →L+2(A) (96%)                                                                      |
| 36868.66416   | 271.2330438     | 0.1205            | H-1(A) →L+1(A) (11%), H-2(B) →LUMO(B) (49%)                                                |
| 38166.4192    | 262.0104325     | 0.0017            | H-3(A) →LUMO(A) (29%), H-2(B) →L+1(B) (68%)                                                |
| 39934.39872   | 250.4106815     | 0.0224            | H-3(B) →LUMO(B) (66%)                                                                      |
| 40590.132     | 246.3652988     | 0.0001            | H-1(A) →L+2(A) (81%), HOMO(B) →L+3(B) (17%)                                                |
| 42883.98864   | 233.1872645     | 0.1404            | H-2(A) →LUMO(A) (48%), H-1(B) →L+1(B) (21%)                                                |
| 44205.94048   | 226.2139407     | 0.0575            | H-2(A) →L+1(A) (15%), HOMO(A) →L+6(A) (11%), H-5(B) →LUMO(B) (24%), H-1(B) →L+2(B) (14%)   |

**S27:** Selected TD-DFT (B3LYP/6-31g (d, p)) calculated energies, oscillator strengths and compositions of the major electronic transitions for central fused seven membered bicyclic system **5**.



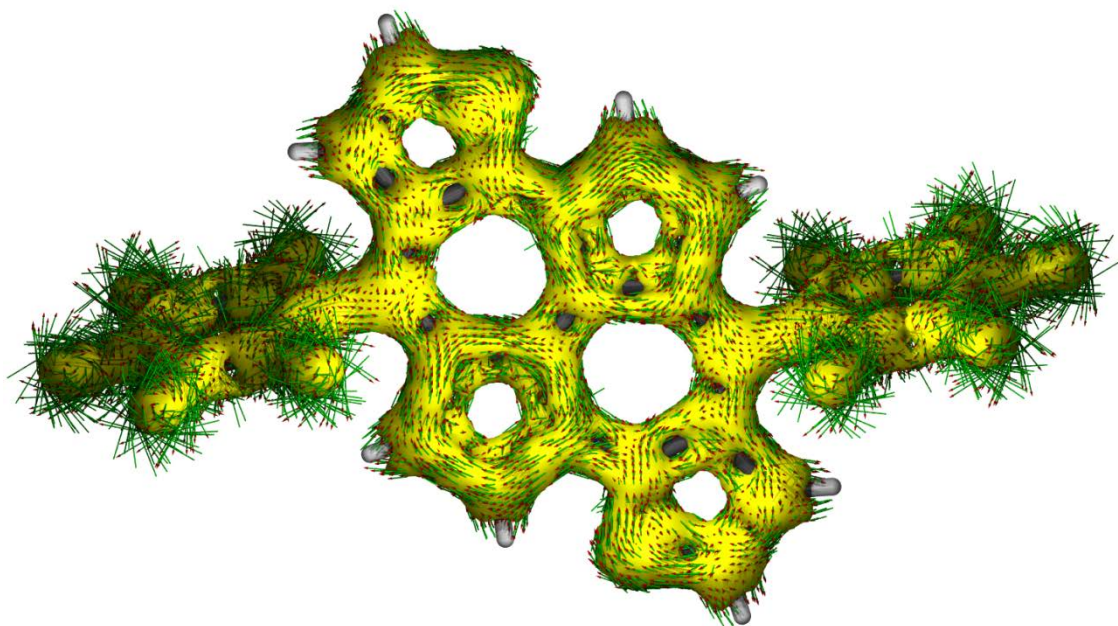

**S28:** AICD plot of **4** at an isosurface value of 0.05. The external magnetic field is applied orthogonal to the molecule plane.

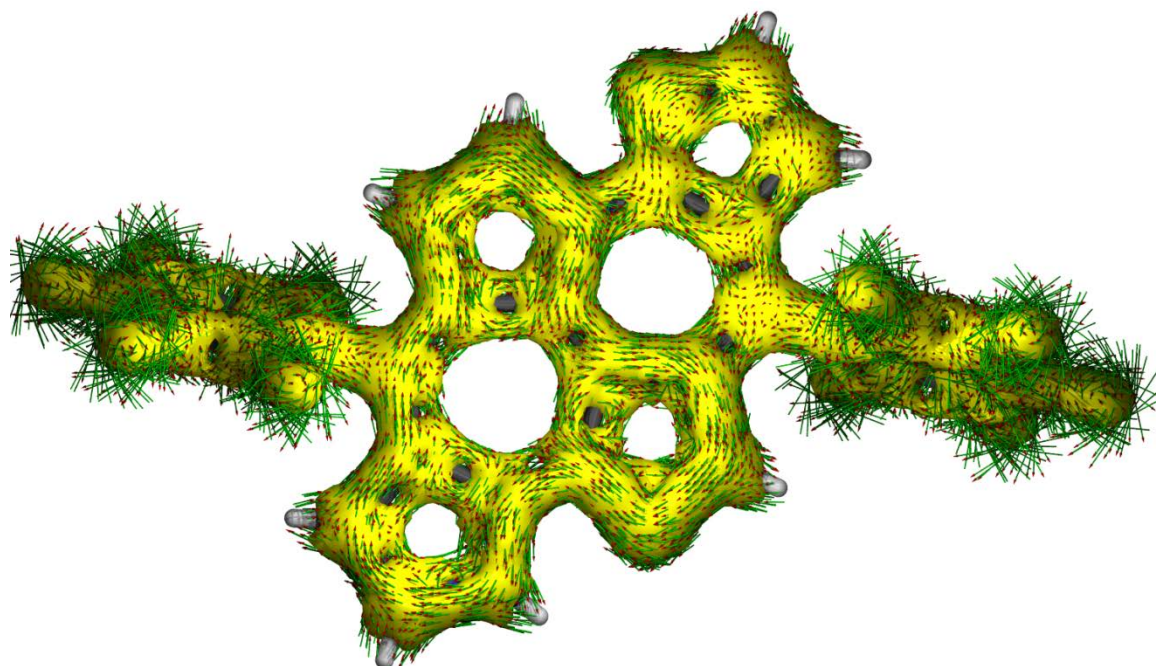

**S29:** AICD plot of **5** at an isosurface value of 0.05. The external magnetic field is applied orthogonal to the molecule plane.

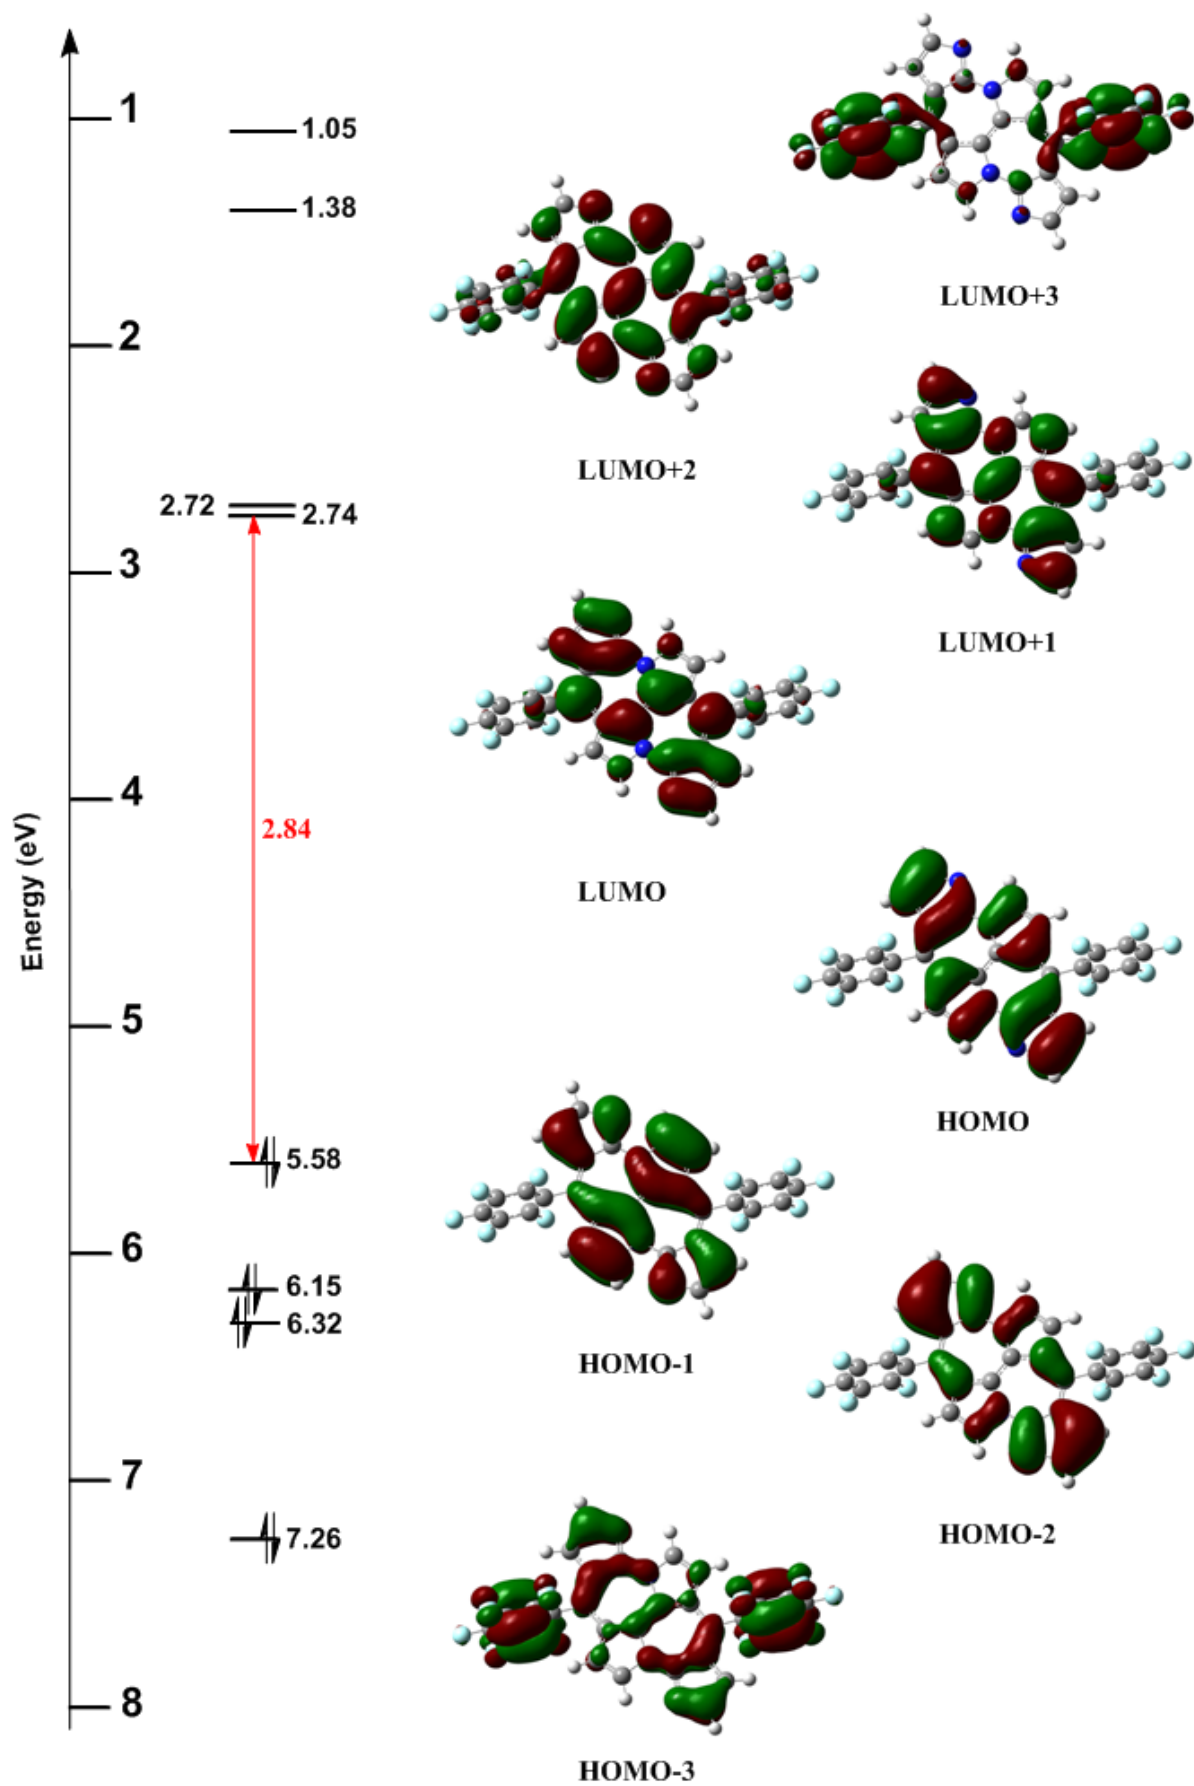

**S30:** Frontier MOs of **4** calculated at the B3LYP/6-31G(d,p) level.

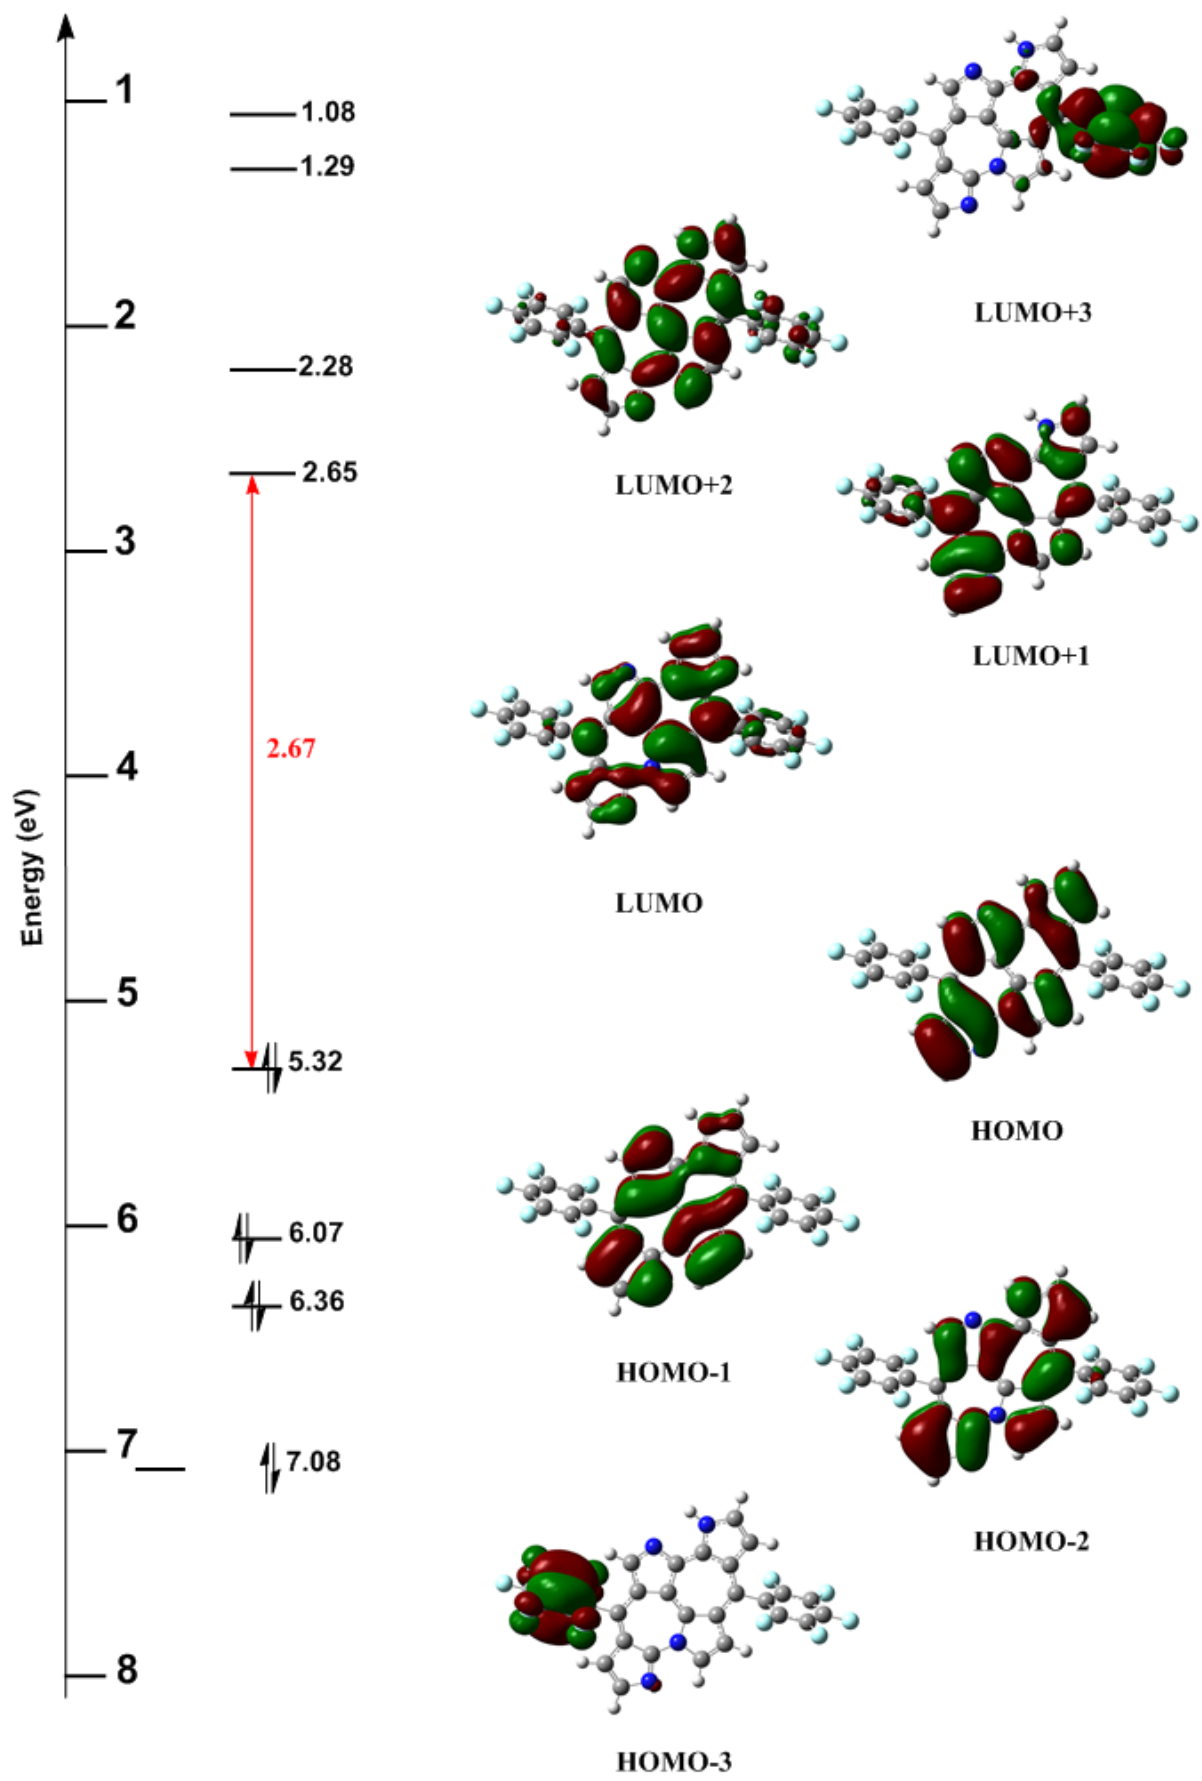

**S31:** Frontier MOs of **5** calculated at the B3LYP/6-31G(d,p) level.

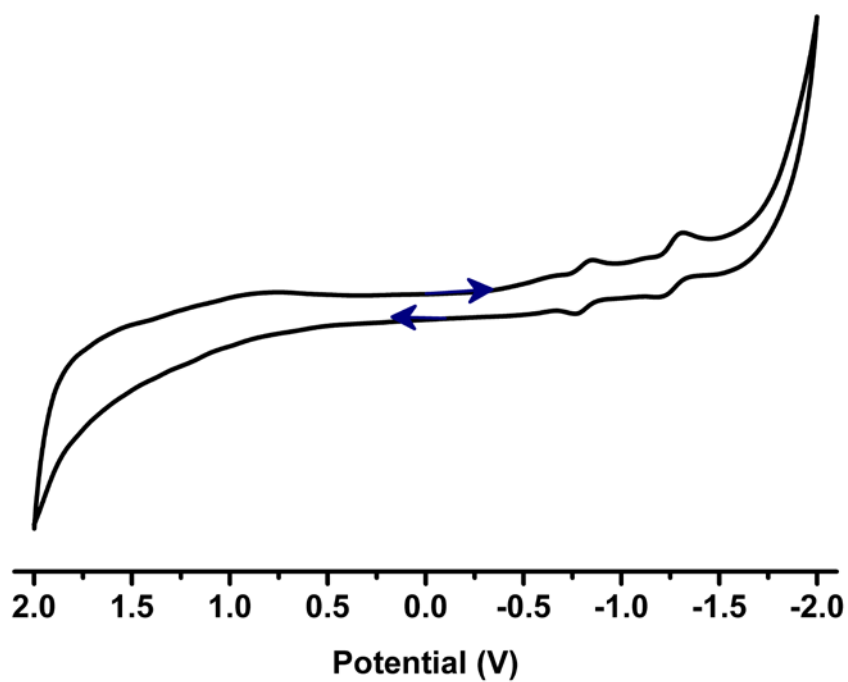

S32: Cyclic voltammogram of 4 were recorded in  $\text{CH}_2\text{Cl}_2$  using TBAP as a supporting electrolyte.

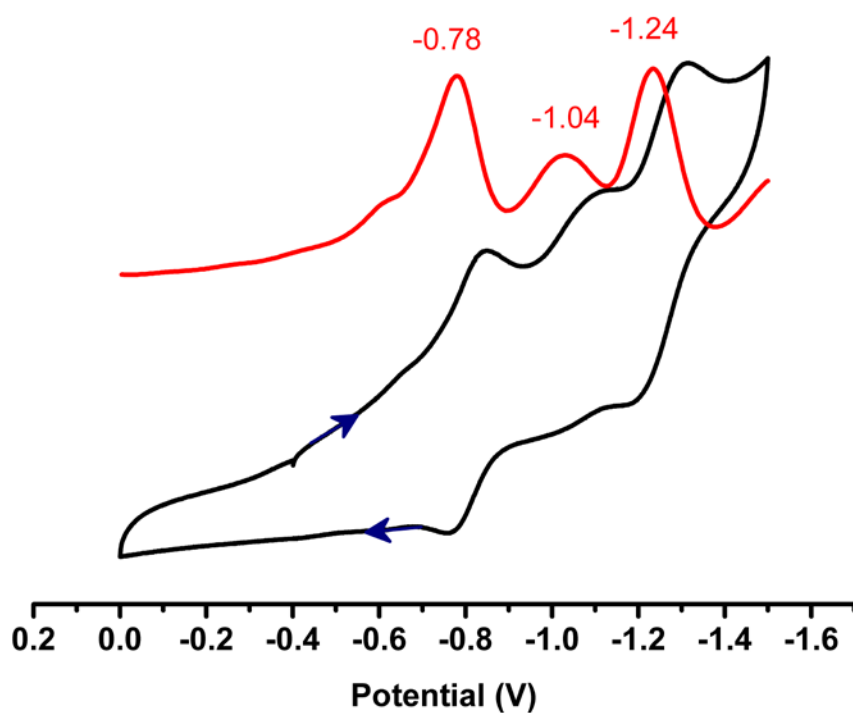

S33: Cyclic voltammogram (black line) and differential pulse voltammogram (red line) of 4.

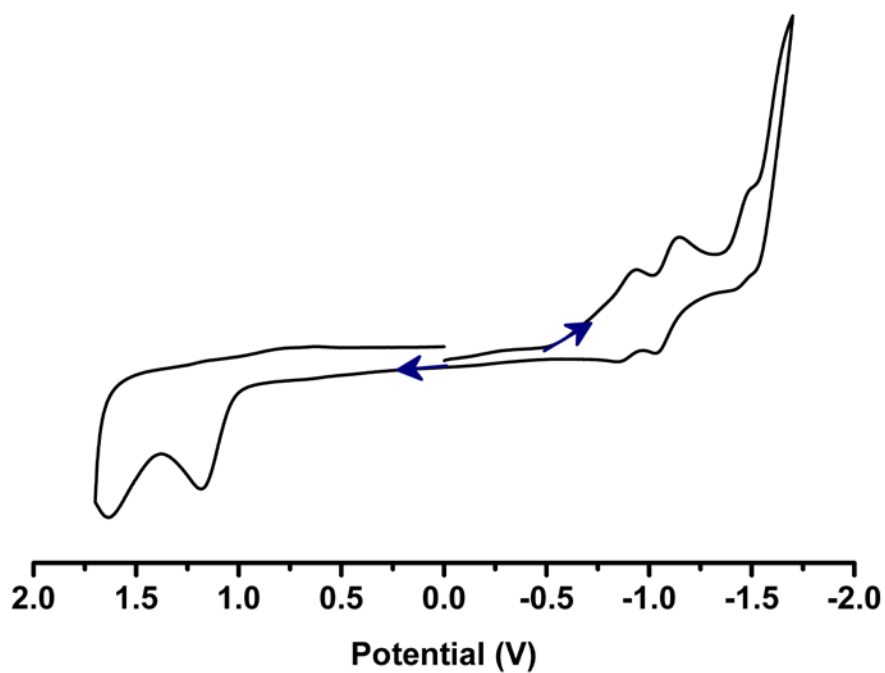

S34: Cyclic voltammogram of **5** were recorded in  $\text{CH}_2\text{Cl}_2$  using TBAP as a supporting electrolyte.

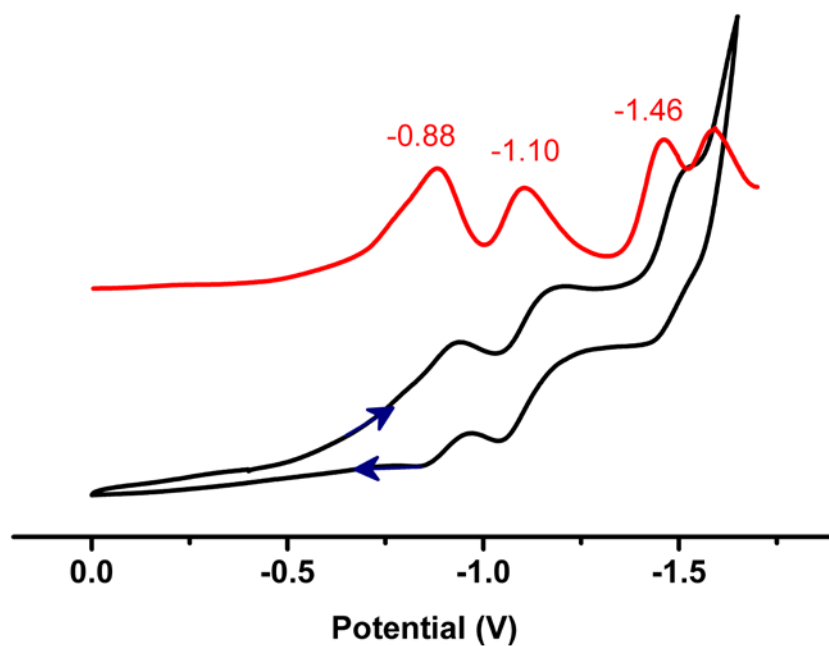

S35: Cyclic voltammogram (black line) and differential pulse voltammogram (red line) of **5**.

**S36:** Coordinates Table for optimized structure **4**

| Sr.No. | Atom | X        | Y        | Z        |
|--------|------|----------|----------|----------|
| 1      | F    | 8.309239 | 0.870351 | -0.10525 |
| 2      | F    | 4.510532 | -1.0135  | -2.14861 |
| 3      | F    | 4.201537 | 0.844628 | 2.195586 |
| 4      | F    | 6.831998 | 1.476199 | 2.108313 |
| 5      | F    | 7.136521 | -0.37487 | -2.23097 |
| 6      | N    | -0.03957 | -1.85781 | 0.345251 |
| 7      | N    | 1.317301 | -3.72693 | 0.688426 |
| 8      | C    | 7.013311 | 0.556051 | -0.06202 |
| 9      | C    | 6.257869 | 0.866037 | 1.06692  |
| 10     | C    | 4.906015 | 0.533255 | 1.099735 |
| 11     | C    | 4.278124 | -0.10675 | 0.02843  |
| 12     | C    | 2.826487 | -0.47911 | 0.088499 |
| 13     | C    | 1.890591 | 0.56809  | -0.10911 |
| 14     | C    | -0.44823 | -0.53958 | 0.099549 |
| 15     | C    | 5.059502 | -0.40447 | -1.09051 |
| 16     | C    | 6.413464 | -0.08063 | -1.14612 |
| 17     | C    | 2.275592 | 1.917484 | -0.36823 |
| 18     | H    | 3.287354 | 2.281545 | -0.44993 |
| 19     | C    | -1.15331 | -2.66831 | 0.505195 |
| 20     | H    | -0.99989 | -3.71512 | 0.703687 |
| 21     | C    | 2.5367   | -1.80388 | 0.332575 |
| 22     | C    | 1.230158 | -2.43969 | 0.447463 |
| 23     | C    | 2.6814   | -4.00319 | 0.744685 |
| 24     | H    | 3.006943 | -5.01791 | 0.935436 |
| 25     | C    | 3.455709 | -2.89599 | 0.541819 |
| 26     | H    | 4.533516 | -2.83255 | 0.540466 |
| 27     | F    | -8.30924 | -0.87035 | 0.105266 |
| 28     | F    | -4.51053 | 1.013504 | 2.148611 |
| 29     | F    | -4.20154 | -0.84463 | -2.19558 |
| 30     | F    | -6.832   | -1.4762  | -2.10831 |
| 31     | F    | -7.13652 | 0.374874 | 2.230979 |
| 32     | N    | 0.039565 | 1.857805 | -0.34526 |
| 33     | N    | -1.3173  | 3.726923 | -0.68844 |
| 34     | C    | -7.01331 | -0.55605 | 0.062029 |
| 35     | C    | -6.25787 | -0.86604 | -1.06691 |
| 36     | C    | -4.90602 | -0.53326 | -1.09973 |
| 37     | C    | -4.27812 | 0.106752 | -0.02843 |
| 38     | C    | -2.82649 | 0.47911  | -0.0885  |
| 39     | C    | -1.89059 | -0.56809 | 0.109108 |
| 40     | C    | 0.448227 | 0.539583 | -0.09956 |
| 41     | C    | -5.0595  | 0.404467 | 1.090515 |
| 42     | C    | -6.41346 | 0.080631 | 1.14613  |
| 43     | C    | -2.27559 | -1.91749 | 0.368227 |

|    |   |          |          |          |
|----|---|----------|----------|----------|
| 44 | H | -3.28735 | -2.28155 | 0.449927 |
| 45 | C | 1.153311 | 2.668313 | -0.5052  |
| 46 | H | 0.999888 | 3.71512  | -0.70369 |
| 47 | C | -2.5367  | 1.803878 | -0.33258 |
| 48 | C | -1.23016 | 2.439691 | -0.44747 |
| 49 | C | -2.6814  | 4.003191 | -0.7447  |
| 50 | H | -3.00694 | 5.017902 | -0.93545 |
| 51 | C | -3.45571 | 2.895991 | -0.54183 |
| 52 | H | -4.53352 | 2.832544 | -0.54047 |

---

**S37: Coordinates Table for optimized structure 5**

| Sr.No. | Atom | X        | Y        | Z        |
|--------|------|----------|----------|----------|
| 1      | F    | -4.57163 | -0.76353 | -2.25958 |
| 2      | F    | -4.17918 | 0.590767 | 2.263799 |
| 3      | F    | -8.314   | 0.925217 | 0.040352 |
| 4      | F    | -7.18713 | -0.08834 | -2.22979 |
| 5      | F    | -6.79812 | 1.260953 | 2.284199 |
| 6      | F    | 4.174106 | -0.55408 | 2.277121 |
| 7      | F    | 4.526863 | 0.705439 | -2.27499 |
| 8      | F    | 6.803643 | -1.18197 | 2.302083 |
| 9      | F    | 8.305238 | -0.87382 | 0.045365 |
| 10     | F    | 7.154418 | 0.071458 | -2.24244 |
| 11     | N    | -1.34024 | -3.81078 | -0.0027  |
| 12     | N    | 1.413804 | 3.789384 | -0.04094 |
| 13     | H    | 0.625205 | 4.421272 | -0.04919 |
| 14     | N    | 0.035522 | -1.92476 | -0.02506 |
| 15     | C    | -0.05595 | 1.885825 | -0.03922 |
| 16     | C    | 1.157499 | -2.74571 | -0.04056 |
| 17     | H    | 1.008254 | -3.81251 | -0.05025 |
| 18     | N    | -1.13477 | 2.725122 | -0.05677 |
| 19     | C    | -5.09528 | -0.27078 | -1.13041 |
| 20     | C    | -6.44513 | 0.073529 | -1.12918 |
| 21     | C    | -7.02133 | 0.592359 | 0.027786 |
| 22     | C    | -2.2072  | 1.939337 | -0.04787 |
| 23     | H    | -3.20354 | 2.364237 | -0.06637 |
| 24     | C    | -4.29288 | -0.10984 | 0.002277 |
| 25     | C    | -1.8979  | 0.55253  | -0.02306 |
| 26     | C    | -2.54918 | -1.8471  | 0.001974 |
| 27     | C    | -1.24667 | -2.50182 | -0.01174 |
| 28     | C    | -0.44645 | 0.499622 | -0.02088 |
| 29     | C    | 1.233682 | 2.437409 | -0.03693 |
| 30     | C    | 2.531122 | 1.836516 | -0.01769 |
| 31     | C    | -3.47251 | -2.95919 | 0.025362 |
| 32     | H    | -4.55006 | -2.89131 | 0.050465 |



|    |   |          |          |          |
|----|---|----------|----------|----------|
| 33 | C | 0.430591 | -0.59164 | -0.01871 |
| 34 | C | -6.24595 | 0.764586 | 1.17198  |
| 35 | C | 1.893194 | -0.60189 | -0.02335 |
| 36 | C | 3.474305 | 2.930099 | -0.00542 |
| 37 | H | 4.549503 | 2.847687 | 0.018054 |
| 38 | C | -2.84409 | -0.49651 | -0.00634 |
| 39 | C | 4.886147 | -0.39224 | 1.154655 |
| 40 | C | 2.278744 | -1.98464 | -0.04011 |
| 41 | H | 3.289072 | -2.36084 | -0.06074 |
| 42 | C | 2.812671 | 0.460517 | -0.01421 |
| 43 | C | -2.70633 | -4.08872 | 0.020179 |
| 44 | H | -3.03594 | -5.11978 | 0.033416 |
| 45 | C | 2.7595   | 4.09267  | -0.02027 |
| 46 | H | 3.096212 | 5.118699 | -0.01752 |
| 47 | C | -4.89824 | 0.41446  | 1.147326 |
| 48 | C | 4.266597 | 0.092408 | -0.00075 |
| 49 | C | 5.063637 | 0.241158 | -1.13911 |
| 50 | C | 7.007729 | -0.56322 | 0.030091 |
| 51 | C | 6.239309 | -0.72143 | 1.181318 |
| 52 | C | 6.419216 | -0.07984 | -1.13627 |

**S38:** Coordinates Table for optimized structure **Me-5**

| Sr.No. | Atom | X        | Y        | Z        |
|--------|------|----------|----------|----------|
| 1      | F    | 8.312488 | 0.813072 | -0.03311 |
| 2      | F    | -8.26488 | -1.05128 | 0.103598 |
| 3      | F    | 6.81578  | 1.304121 | 2.195751 |
| 4      | F    | 4.197136 | 0.630114 | 2.24516  |
| 5      | F    | -4.43287 | 0.637373 | 2.254668 |
| 6      | F    | -7.05498 | -0.02334 | 2.323574 |
| 7      | F    | -6.82982 | -1.41529 | -2.18879 |
| 8      | F    | -4.20607 | -0.76092 | -2.26338 |
| 9      | F    | 4.55252  | -1.04098 | -2.17294 |
| 10     | F    | 7.167711 | -0.36057 | -2.21511 |
| 11     | C    | -6.23665 | -0.91349 | -1.10089 |
| 12     | N    | 1.168627 | 2.580286 | -0.34218 |
| 13     | N    | -0.01747 | -2.03169 | 0.241907 |
| 14     | N    | 1.354103 | -3.90832 | 0.477173 |
| 15     | C    | 7.020426 | 0.47762  | -0.00987 |
| 16     | C    | 6.255045 | 0.728897 | 1.126476 |
| 17     | C    | 4.908002 | 0.3756   | 1.138575 |
| 18     | C    | 4.294088 | -0.22896 | 0.038997 |
| 19     | C    | 2.845868 | -0.61937 | 0.073536 |
| 20     | C    | 1.897992 | 0.420801 | -0.06253 |



|    |   |          |          |          |
|----|---|----------|----------|----------|
| 21 | C | 0.445387 | 0.387845 | -0.05652 |
| 22 | C | -0.41729 | -0.70662 | 0.077637 |
| 23 | C | -1.87415 | -0.72617 | 0.083321 |
| 24 | C | -2.78481 | 0.329514 | -0.04914 |
| 25 | C | -4.23863 | -0.04369 | -0.00606 |
| 26 | C | -4.8867  | -0.57052 | -1.12583 |
| 27 | C | -6.97067 | -0.72744 | 0.06846  |
| 28 | C | 0.06424  | 1.779895 | -0.23334 |
| 29 | C | 2.226715 | 1.78712  | -0.24279 |
| 30 | H | 3.228453 | 2.194702 | -0.30658 |
| 31 | C | -1.22889 | 2.344201 | -0.29943 |
| 32 | C | -2.51301 | 1.695457 | -0.21971 |
| 33 | C | -3.5038  | 2.728511 | -0.35351 |
| 34 | H | -4.57387 | 2.596906 | -0.3458  |
| 35 | C | -2.83969 | 3.905442 | -0.49921 |
| 36 | H | -3.22157 | 4.907918 | -0.62629 |
| 37 | N | -1.47329 | 3.691315 | -0.46837 |
| 38 | C | -0.51415 | 4.788038 | -0.60217 |
| 39 | H | 0.127733 | 4.85117  | 0.275839 |
| 40 | H | -1.08853 | 5.70999  | -0.71209 |
| 41 | H | 0.125277 | 4.640628 | -1.47181 |
| 42 | C | 1.260989 | -2.60969 | 0.312332 |
| 43 | C | 2.721251 | -4.18212 | 0.520845 |
| 44 | H | 3.051148 | -5.20476 | 0.652601 |
| 45 | C | 3.487437 | -3.06077 | 0.385475 |
| 46 | H | 4.565156 | -2.99046 | 0.390912 |
| 47 | C | 2.561634 | -1.96013 | 0.238179 |
| 48 | C | -1.13783 | -2.84872 | 0.350146 |
| 49 | H | -0.98468 | -3.9065  | 0.484424 |
| 50 | C | -2.26084 | -2.09687 | 0.259447 |
| 51 | H | -3.27114 | -2.4693  | 0.316868 |
| 52 | C | -5.00024 | 0.131986 | 1.151658 |
| 53 | C | -6.35183 | -0.20234 | 1.200676 |
| 54 | C | 5.085922 | -0.46848 | -1.08656 |
| 55 | C | 6.435042 | -0.1226  | -1.12197 |

**S39:** Coordinates Table for optimized structure of central fused seven membered bicyclic system **4**

| Sr. No. | Atom | X         | Y         | Z         |
|---------|------|-----------|-----------|-----------|
| 1       | N    | 1.160627  | -1.472125 | 0.000538  |
| 2       | C    | 2.540288  | 1.256408  | 0.000096  |
| 3       | C    | 1.157669  | 1.553328  | 0.000359  |
| 4       | C    | -0.018578 | -0.7681   | -0.000072 |
| 5       | C    | 3.140658  | 0.009003  | -0.000225 |

|    |   |           |           |           |
|----|---|-----------|-----------|-----------|
| 6  | C | 2.503643  | -1.223454 | -0.00023  |
| 7  | N | -1.160626 | 1.472125  | -0.000567 |
| 8  | C | -2.540289 | -1.256408 | -0.000061 |
| 9  | C | -1.15767  | -1.553328 | -0.000333 |
| 10 | C | 0.018579  | 0.768099  | 0.000071  |
| 11 | C | -3.140658 | -0.009002 | 0.000229  |
| 12 | C | -2.503643 | 1.223454  | 0.0002    |
| 13 | H | -0.947658 | -2.624258 | -0.000617 |
| 14 | H | -3.197652 | -2.120454 | -0.000165 |
| 15 | H | -4.225957 | 0.032975  | 0.000604  |
| 16 | H | -3.090255 | 2.133612  | 0.000019  |
| 17 | H | -0.969435 | 2.465857  | -0.000925 |
| 18 | H | 0.947656  | 2.624258  | 0.000655  |
| 19 | H | 3.197651  | 2.120455  | 0.000226  |
| 20 | H | 4.225957  | -0.032974 | -0.000598 |
| 21 | H | 3.090256  | -2.133611 | -0.000077 |
| 22 | H | 0.969437  | -2.465857 | 0.000879  |

**S40:** Coordinates Table for optimized structure of central fused seven membered bicyclic system **5**

| Sr. No. | Atom | X         | Y         | Z         |
|---------|------|-----------|-----------|-----------|
| 1       | N    | 1.609392  | -1.334423 | -0.577677 |
| 2       | C    | -0.787145 | 1.561022  | -0.03841  |
| 3       | C    | 1.642189  | 1.514711  | -0.383691 |
| 4       | C    | 3.263863  | -0.071697 | 0.658758  |
| 5       | C    | 2.662191  | -1.234956 | 0.367065  |
| 6       | C    | 0.398834  | 0.735713  | -0.239514 |
| 7       | C    | -2.103269 | 1.280645  | 0.105534  |
| 8       | C    | 0.389093  | -0.637549 | -0.30435  |
| 9       | C    | -0.767687 | -1.505447 | -0.160859 |
| 10      | C    | 2.881355  | 1.191182  | 0.044632  |
| 11      | C    | -2.087762 | -1.251838 | 0.005847  |
| 12      | H    | -0.515161 | -2.56407  | -0.208895 |
| 13      | H    | -2.723493 | -2.133823 | 0.06321   |
| 14      | H    | -2.75327  | 2.145679  | 0.224523  |
| 15      | H    | -0.553931 | 2.623608  | -0.012459 |
| 16      | H    | 1.504018  | 2.51476   | -0.791824 |
| 17      | H    | 3.66085   | 1.945697  | -0.047161 |
| 18      | H    | 4.085396  | -0.077179 | 1.369457  |
| 19      | H    | 2.980556  | -2.164257 | 0.83824   |
| 20      | H    | 1.432177  | -2.293816 | -0.843078 |
| 21      | C    | -2.815462 | 0.005621  | 0.130314  |
| 22      | C    | -4.164249 | -0.019929 | 0.277171  |
| 23      | H    | -4.714889 | -0.95427  | 0.296971  |
| 24      | H    | -4.739694 | 0.893754  | 0.379779  |
